# Supplementary material
Source: PubMed Central journal article supplement (PMC6675458)
Supplement: NIHMS1516870-supplement-1.pdf [file NIHMS1516870-supplement-1.pdf]

## Endovascular Versus Open Repair of Intact Descending Thoracic Aortic Aneurysms

### Supplementary Appendix

Peter Chiu, MD, MS<sup>1,2</sup>; Andrew B. Goldstone, MD, PhD<sup>1,2</sup>; Justin M. Schaffer, MD<sup>3</sup>; Bharathi Lingala, PhD<sup>1</sup>; D. Craig Miller, MD<sup>1</sup>; R. Scott Mitchell, MD<sup>1</sup>; Y. Joseph Woo, MD<sup>1</sup>; Michael P. Fischbein, MD, PhD<sup>1</sup>; Michael D. Dake, MD<sup>1</sup>

From the <sup>1</sup>Department of Cardiothoracic Surgery, Stanford University, School of Medicine, *Stanford, CA*

<sup>2</sup>Department of Health and Research Policy, Stanford University, School of Medicine, *Stanford, CA*

<sup>3</sup>The Heart Hospital Baylor Plano, *Plano, TX*

| <b>Table of Contents</b> |                                                                                                                                                                                                   | <b>Page Number</b> |
|--------------------------|---------------------------------------------------------------------------------------------------------------------------------------------------------------------------------------------------|--------------------|
| Methods                  | Author Contributions, Funding Sources, Statistical Analysis                                                                                                                                       | 3                  |
| Figure S1                | Annual Frequency of TEVAR vs. Open Repair of Descending Thoracic Aortic Aneurysm                                                                                                                  | 11                 |
| Figure S2                | Modified Consort Diagram                                                                                                                                                                          | 12                 |
| Figure S3                | Distribution of Propensity Scores                                                                                                                                                                 | 13                 |
| Figure S4                | Cumulative Incidence of Mortality, Landmark analysis, contingent on 180-day survival                                                                                                              | 15                 |
| Figure S5                | Plot of Restricted Mean Survival Time                                                                                                                                                             | 16                 |
| Figure S6                | Cumulative Incidence of Mortality, Unmatched vs. matched TEVAR patients                                                                                                                           | 17                 |
| Figure S7                | Sensitivity Analysis (Institutional Effects): Cumulative incidence of mortality restricting the dataset to the 349 hospitals present before and after the introduction of TEVAR                   | 18                 |
| Figure S8                | Sensitivity Analysis (Secular Trend): Cumulative incidence of mortality comparing open surgical repair patients from the early period of the study with those from the late period                | 19                 |
| Figure S9                | Sensitivity Analysis (Hospital Volume): Mid-term survival after accounting for volume. Patients undergoing open surgical repair at high-volume open surgical centers matched with TEVAR patients. | 20                 |
| Figure S10               | Sensitivity Analysis (Hospital Volume): Mid-term survival after accounting for volume. Patients undergoing open surgical repair at low-volume open surgical centers matched with TEVAR patients.  | 21                 |
| Figure S11               | Sensitivity Analysis (Discontinuity): Mid-term survival after narrowing the population under investigation to the years immediately surrounding the discontinuity, i.e. 2004 to 2006.             | 22                 |
| Table S1                 | Propensity Score Model: Main analysis                                                                                                                                                             | 23                 |
| Table S2                 | Baseline characteristics of TEVAR patients who were able to be matched and those who were not matched.                                                                                            | 25                 |
| Table S3                 | Sensitivity Analysis (Institutional Effects): Propensity score model restricting the dataset to the 349 hospitals present before and after the introduction of TEVAR                              | 27                 |

|            |                                                                                                                                                                                                                |    |
|------------|----------------------------------------------------------------------------------------------------------------------------------------------------------------------------------------------------------------|----|
| Table S4   | Sensitivity Analysis (Institutional Effects): Baseline characteristics restricting the dataset to the 349 hospitals present before and after the introduction of TEVAR                                         | 29 |
| Table S5   | Sensitivity Analysis (Secular Trend): Propensity score model for comparison of open surgical repair patients from the early period of the study with those from the late period                                | 32 |
| Table S6   | Sensitivity Analysis (Secular Trend): Baseline characteristics comparing open surgical repair patients from the early period of the study with those from the late period                                      | 34 |
| Table S7   | Sensitivity Analysis (Hospital Volume): Propensity score model for comparison of high-volume open surgical centers with TEVAR                                                                                  | 37 |
| Table S8   | Sensitivity Analysis (Hospital Volume): Baseline characteristics comparing high-volume open surgical centers with TEVAR                                                                                        | 39 |
| Table S9   | Sensitivity Analysis (Hospital Volume): Propensity score model for comparison of low-volume open surgical centers with TEVAR                                                                                   | 42 |
| Table S10  | Sensitivity Analysis (Hospital Volume): Baseline characteristics comparing low-volume open surgical centers with TEVAR                                                                                         | 44 |
| Table S11  | Sensitivity Analysis (Discontinuity): Propensity score model for the comparison after narrowing the population under investigation to the years immediately surrounding the discontinuity, i.e. 2004 to 2006   | 47 |
| Table S12  | Sensitivity Analysis (Discontinuity): Baseline characteristics for the comparison after narrowing the population under investigation to the years immediately surrounding the discontinuity, i.e. 2004 to 2006 | 49 |
| References | Supplementary Appendix References                                                                                                                                                                              | 52 |

## METHODS

### *Author Contributions*

Peter Chiu, Andrew B. Goldstone, Justin Schaffer, and Michael D. Dake designed the study. Bharathi Lingala output the data into an analyzable format. Peter Chiu analyzed the data. All authors vouch for the validity of the data and analysis. Peter Chiu and Justin M. Schaffer prepared the first draft of the manuscript. All authors contributed to interpreting the data, performing critical edits, and approving the final version of the manuscript prior to submission.

### *Funding Sources*

This work was conducted with support from a KL2 Mentored Career Development Award of the Stanford Clinical and Translational Science Award to Spectrum and from a TL1 Clinical Research Training Program grant (PC - NIH KL2 TR 001083; ABG - NIH TL1 TR 001084).

### *Statistical Analysis*

In this supplementary statistical analysis section, we will discuss: 1) use of administrative databases in patients with thoracic aortic disease, 2) pitfalls of using ICD-9 procedure codes in the evaluation of thoracic aortic diseases; 3) our use of a regression discontinuity design; 4) use of optimal matching to account for observed confounders; 5) methodology for survival analyses – time partitioning and RMST; 6) sensitivity analyses; and 7) list the statistical packages used during the data analysis.

### Use of Administrative Databases in Patients with Thoracic Aortic Disease

Prior attempts to use administrative data from the Medicare database to evaluate the treatment of thoracic aortic disease employed ICD-9 codes and reported outcomes for open surgical repair of descending thoracic aortic aneurysms that were superior to outcomes reported by high-volume centers of excellence; this was despite being limited to a high risk population of Medicare beneficiaries.<sup>1-3</sup> This

introduced the possibility of misclassification. ICD-9 procedure and diagnosis codes fail to differentiate between ascending and descending thoracic aortic aneurysms. These operations have fundamentally different risk profiles, and a comparison relying purely on these codes may lead to inaccurate and biased conclusions. For example, the perioperative mortality for elective ascending aortic replacement in the Society of Thoracic Surgeons database has been reported to be 3.4%, while the operative risk associated with open descending thoracic aortic replacement has been reported by centers of excellence to be as high as 8-12%.<sup>4-6</sup>

#### Pitfalls of using ICD-9 procedure codes

We first attempted to replicate prior studies of open vs. endovascular repair of descending thoracic aortic aneurysms by using ICD-9 diagnosis and procedure codes to identify appropriate Medicare Beneficiaries. An underutilized feature of the Medicare database is the ability to link individual surgeon-billed procedure claims (Current Procedural Terminology [CPT] codes) to particular hospital stays. CPT codes contain more anatomic information than ICD-9 codes and thus help to clarify the exact operation performed. We then linked these patients' ICD-9 data to these billed CPT codes to identify more accurately the actual surgical procedure performed. We have previously demonstrated that this could be performed for patients who underwent TEVAR<sup>7</sup> and open descending thoracic aortic aneurysm repair.<sup>8</sup> We found that using ICD-9 codes alone to identify patients undergoing open surgical repair of a thoracic aortic aneurysm was associated with a high risk (up to 70%) of including patients who had an ascending or thoracoabdominal aortic repair (as determined by CPT code). As such, we believe it is critically important that future studies evaluating the management of descending thoracic aortic aneurysms in Medicare beneficiaries link CPT codes to Medicare beneficiary hospitalizations to capture accurate and homogeneous cohorts of patients. Given the idiosyncratic nature of ICD-9 codes, this may not be necessary for other procedures.

#### Regression Discontinuity Method

Observational studies frequently employ propensity score methods to account for treatment selection bias. However, we have previously suggested that anatomy influences treatment selection, and this information was not available in the Medicare data.<sup>9</sup> As such, we decided against using standard propensity score and g-estimation methods.

Food and Drug Administration (FDA) approval of TEVAR in September of 2005 resulted in an immediate and substantial change in treatment selection. Following the introduction of TEVAR, 94.4% of cases were treated endovascularly (Figure S1). In this way, time appeared to be positively correlated with the treatment received in an almost dichotomous fashion. We took advantage of this feature by using a regression discontinuity design. Patients who had repair of a descending thoracic aortic aneurysm prior to September of 2005 were encouraged toward open surgical repair as TEVAR was not an option outside of clinical trials or physician-sponsored investigational device exemptions. Patients who had a repair of descending thoracic aortic aneurysm after September of 2005 were encouraged toward TEVAR as almost all patients treated after FDA approval of the device were treated endovascularly. This may be viewed as a form of pseudo-randomization as patients treated on either side of the discontinuity will be similar with the exception of increasing clinical eligibility for intervention. This is observable in the data as an imbalance in baseline covariates.

Due to the lack of anatomical data, we were unable to discover the patients from the open surgical repair era (pre-FDA approval of TEVAR) who would have been anatomically unsuitable for TEVAR. As such, we avoided excluding such patients from the TEVAR era. This group was most likely represented by the group of patients who were encouraged toward TEVAR but still underwent open surgical repair similar to treatment non-compliance in a randomized trial. Presumably, the number of patients undergoing open surgical repair with anatomy unsuitable for TEVAR would not change over time, as the clinical eligibility criteria for surgery would not change significantly. We then used an intention-to-treat encouragement design: patients who were encouraged to receive open surgical repair (treated prior to FDA approval of TEVAR) were analyzed together in the open surgical repair group; patients who were encouraged to receive TEVAR (treated after FDA approval of TEVAR) were analyzed altogether as the

TEVAR group. This allowed us to account for anatomical features that may have precluded endovascular repair; attempts to address this potential issue have been scarce in the literature.

### 2:1 Optimal Pair Matching

To account for the differences in observed covariates between the two groups, we used a non-parsimonious logistic regression to estimate the likelihood of being encouraged to open surgical repair conditional on observed baseline covariates. We then used optimal matching to create matched sets that minimized the distance between matched sets. We employed 2:1 matching in order to improve the generalizability of the analysis while excluding a subset of patients who were very unlikely to receive open surgical repair as evidenced by the very low propensity scores among these patients (Figures S3A and S3B). These patients represented a large proportion of the additional patients observed after the introduction of TEVAR. Due to their greater comorbidity burden (Table S2), patients who went unmatched experienced substantially worse unadjusted survival than patients who were able to be matched,  $p < 0.001$  (Figure S6), and this mirrored an analysis of Stanford's early institutional experience by Demers et al.<sup>10</sup> After matching, balance was assessed using standardized mean differences.<sup>11</sup>

### Survival Analysis: Time partitioning and RMST

We used Cox proportional hazards regression to evaluate the effect of TEVAR vs. open surgical repair on mid-term outcomes. Two distinct hazard phases were present: an early-hazard phase in which open surgical repair appeared to be associated with greater risk of mortality, and a late-hazard phase in which open surgical repair appeared to be associated with a lower risk of mortality. We used time-partitioning to account for the non-proportionality of hazards, i.e. changing hazard over time.

In the early hazard phase, the proportionality of hazards assumption was again violated. As a result, we assessed the odds of mortality using logistic regression. Operation at a high-volume open surgical center was a significant effect modifier for perioperative mortality,<sup>8</sup> and standard errors for stratum specific effect estimates were estimated with 500 bootstrap replicates, high-volume open surgical

center: OR 1.97 (95% confidence interval [CI]: 1.53 to 2.61) and for low-volume open surgical centers: OR 3.62 (95% CI 2.88 to 4.51), p-value for interaction = 0.002 (Table 2). As previously reported, TEVAR at a high-volume center did not affect perioperative survival.<sup>7</sup>

The proportionality of hazards assumption was met for contingent 180-day survival in our landmark analysis. Late hazard of death was reduced in the open surgical repair group, HR 0.86 (95% CI 0.77 to 0.95; p = 0.004), Figure S4. This suggested that provided patients were able to survive the first 6 months after the operation, the patients had a lower likelihood of death with open surgical repair than with TEVAR. This may speak to the improved durability of open surgical repair, but whether this improved durability makes a difference for the typical patient is uncertain with this form of analysis.

Restricted Mean Survival Time (RMST) is a model-free approach to addressing non-proportionality of hazards that is based on the area under the survival curve.<sup>12</sup> This value is the population average event-free survival at a certain follow-up point allowing for comparisons of mean survival times between two groups. At 9 years follow-up, the difference in RMST was -209.2 days (95% CI -298.7 to -119.7 days; p <0.001) for open surgical repair thus favoring TEVAR, Table 2 and Figure S5. On average, patients receiving TEVAR lived 209.2 days longer than patients receiving open surgical repair. This analysis would suggest that the early penalty of open surgical repair outweighs the late benefit amongst Medicare beneficiaries. Whether this would hold for patients who are younger is uncertain, as those patients have lower predicted risk of mortality,<sup>13</sup> and this age difference may in part explain the difference observed between our analysis and the meta-analysis by Cheng et al.<sup>14</sup> Among younger patients, the improved long term durability of open surgical repair may be an important consideration.

### Sensitivity Analyses

The regression discontinuity design assumes homogeneity of treatments. This is complicated in its application as not only do practice patterns vary between hospitals, but technical capabilities also vary. Whereas a volume-outcome relationship has been shown to exist for open surgical repair of descending thoracic aortic aneurysms, the same has not been shown for TEVAR.<sup>7,8</sup> Reasons for this include

differences in the technical and technological demands of the two operations. Whereas open surgical repair requires the coordinated efforts of the surgeon, anesthesiologist, operating room staff, intensivist, intensive care nurses, and allied health professionals, TEVAR has a much smaller footprint as it were. This may explain the portability of this technology to the 362 hospitals that had not treated descending thoracic aortic aneurysms in Medicare beneficiaries in the first half of our study period (prior to FDA approval of TEVAR).

A challenge introduced by the change in practice pattern was the potential for differences in hospital-level characteristics to influence outcome. We performed a sensitivity analysis restricted to the 349 hospitals that were observed both in the early and the late period in order to control for hospital-level differences. Data analysis was performed in the same manner with an intention-to-treat design based on encouragement to open surgical repair or TEVAR. Due to reduced ability to construct appropriate balance, 1:1 matching was used to address observed differences in covariates, and appropriate balance was achieved (Tables S3 and S4). With the evolution of referral patterns and the explosion of centers treating descending thoracic aortic aneurysms in the Medicare population, the population under study in this sensitivity analysis was more likely to be selected than in the main analysis as the least complicated patients were the most likely to undergo an operation at centers with the least overall experience treating descending thoracic aortic aneurysms. Despite the reduction in hospital-level variation, this may have resulted in a more complicated group of TEVAR patients (as compared to the main analysis) included in this sensitivity analysis. Despite this, there was no significant change in inference (Figure S7). There was no difference in the survival curves according to the log-rank test, but the difference in RMST at 9-years attributable to open surgical repair still favored TEVAR: -153.8 days (95% CI -261.7 to -45.9;  $p = 0.005$ ). The odds of mortality was increased among patients undergoing open surgical repair compared with TEVAR in univariate matched analysis, OR 3.11 (95% CI 2.34 to 4.21) for a low-volume open surgical center and OR 1.87 (95% CI 1.32 to 2.62) for a high-volume open surgical center, but the hazard of death contingent on 180-day survival was again reduced among open surgical patients, HR 0.83 (95% CI 0.73 to 0.94;  $p = 0.004$ ). The results of this sensitivity analysis match that of our main analysis.



Separately, we evaluated for the possibility that a secular trend might have introduced bias into our regression discontinuity design. We did this by performing a sensitivity analysis on the open surgical repair cohort comparing the 1,235 patients treated in the early period with the 257 patients treated in the late period using a g-estimation method (inverse probability of treatment weighting, IPTW). Using a non-parsimonious logistic regression, probability of undergoing open surgical repair in the early vs. the late period was estimated, and inverse probability weighting with stabilized weights was used to achieve appropriate balance between the groups (Tables S5 and S6).<sup>15</sup> The proportionality of hazards assumption was satisfied, and Cox regression revealed that there was no difference in the hazard of death attributable to undergoing open surgical repair in the early period, HR 1.21 (95% CI 0.97 to 1.51;  $p = 0.1$ ) (Figure S8).

Given the significant interaction between hospital volume and outcome of open surgical repair, we performed a sensitivity analysis to evaluate whether hospital volume would affect our inference. We performed this analysis by selecting only the patients undergoing open surgical repair at high-volume open surgical centers and matching these to TEVAR patients. We then performed the remainder of the analysis as previously described and found appropriate balance after matching (Tables S7 and S8). The odds of early mortality was increased among patients undergoing open surgical repair, OR 2.14 (95% CI 1.62 to 2.83;  $p < 0.001$ ). Mid-term survival was no different using the log-rank test,  $p = 0.2$  (Figure S9). However, RMST at 9-years revealed a difference in mean survival of -136.7 days (-260.5 to -13.0 days;  $p = 0.03$ ) favoring TEVAR.

We separately performed the analysis after matching patients undergoing open operations at low-volume open surgical centers, and found appropriate balance after matching (Tables S9 and S10). The odds of early mortality was increased among patients undergoing open surgical repair, OR 3.58 (95% CI 2.78 to 4.60;  $p < 0.001$ ). Mid-term survival was reduced for open surgical repair patients by the log-rank test,  $p < 0.001$  (Figures S9). RMST at 9-years revealed a difference in mean survival of -330.6 days (-458.4 to -202.8 days;  $p < 0.001$ ) favoring TEVAR once again.

Finally, we narrowed the population under investigation to the years immediately surrounding the discontinuity, i.e. 2004 to 2006. This allowed us to assess the possibility that greater distance from the discontinuity resulted in loss of the pseudo-randomization. Matching created adequate balance (Tables S11 and S12). There was no difference in mid-term survival by the log-rank test,  $p = 0.2$ . However, the difference in RMST remained significant, RMST difference -231.7 days (95% CI -427.8 to -35.6),  $p = 0.02$  (Figure S11).

### Data Analysis

Data were prepared using SAS (SAS Institute Inc., *Cary, NC*); statistical analyses were performed using R version 3.4.1 (R Foundation, *Vienna, Austria*). Matching was performed using the *optmatch* package. We used the *survey* package to evaluate differences in covariates at baseline and in both the matched and weighted populations.<sup>16</sup> Survival and competing risks analyses were performed with the *survival* package.<sup>17</sup>

Figure S1

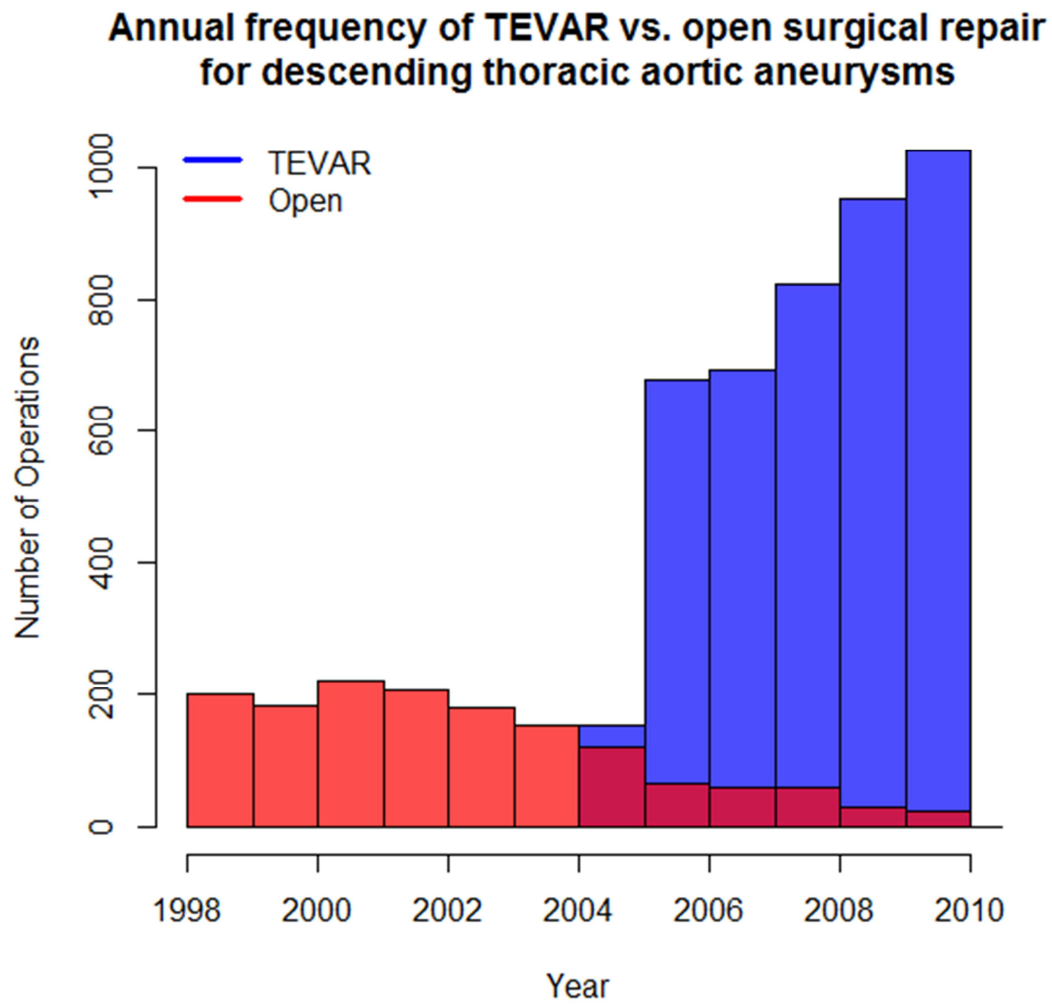

Figure S2

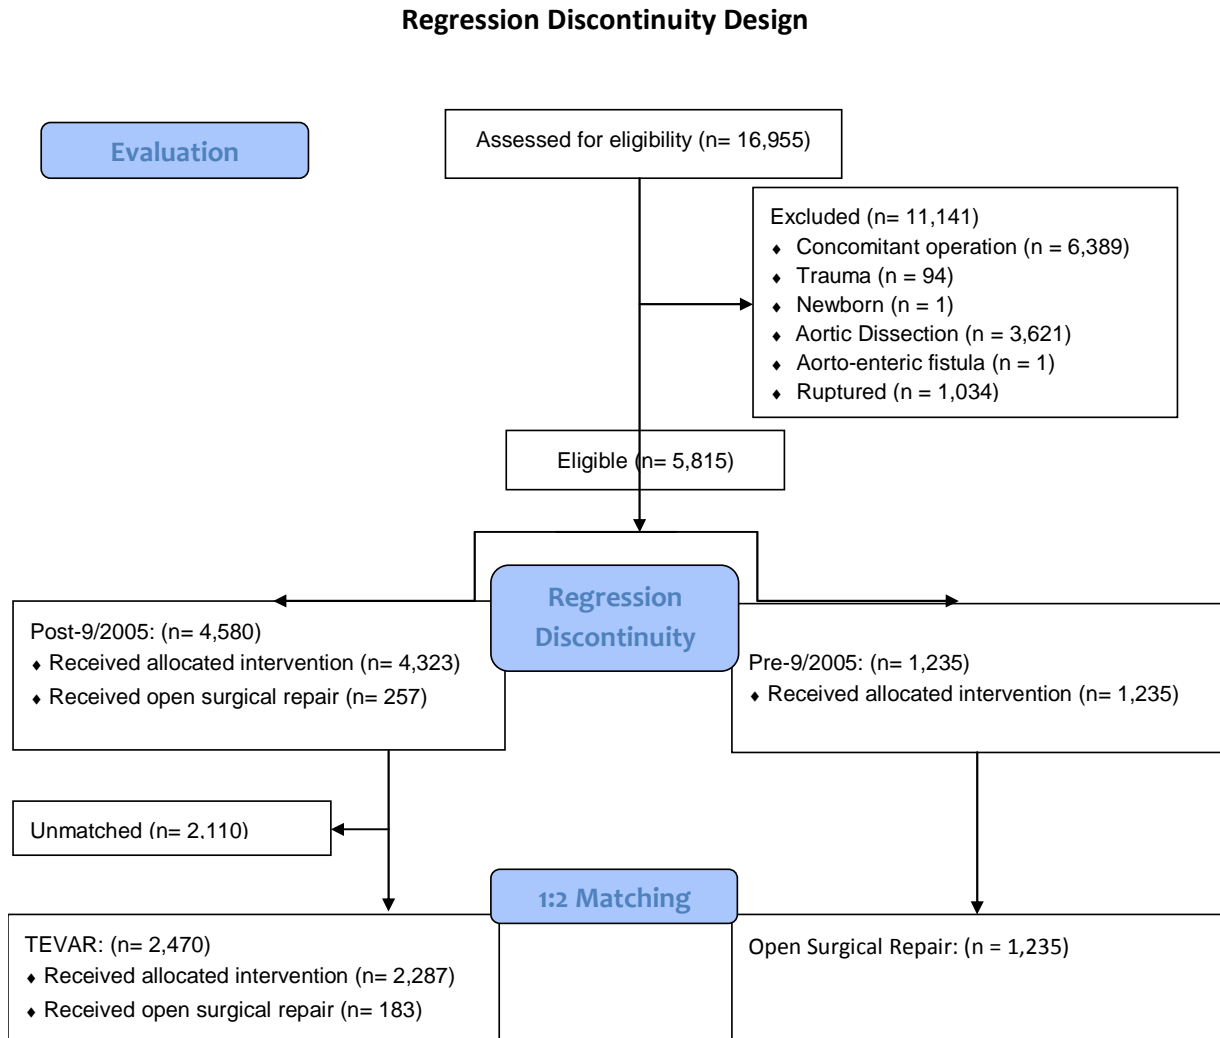

Figure S3A.

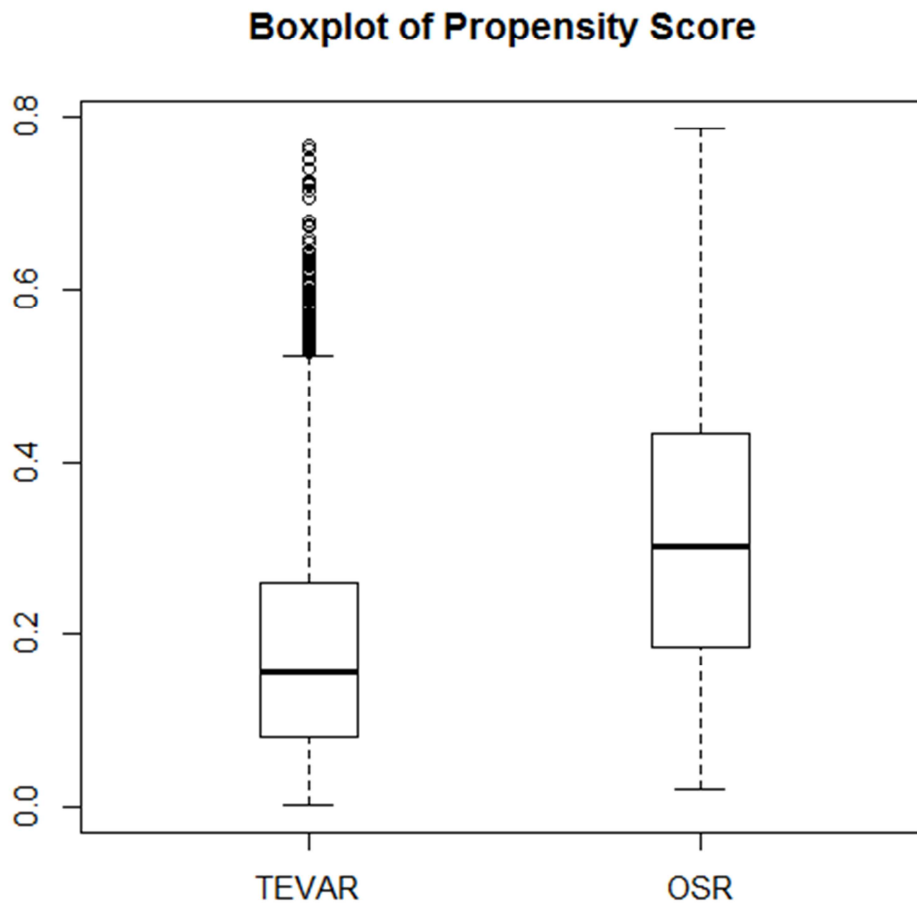

Figure S3B. The unmatched group,  $n = 2,110$ , had very low likelihood of undergoing open surgical repair conditional on baseline covariates.

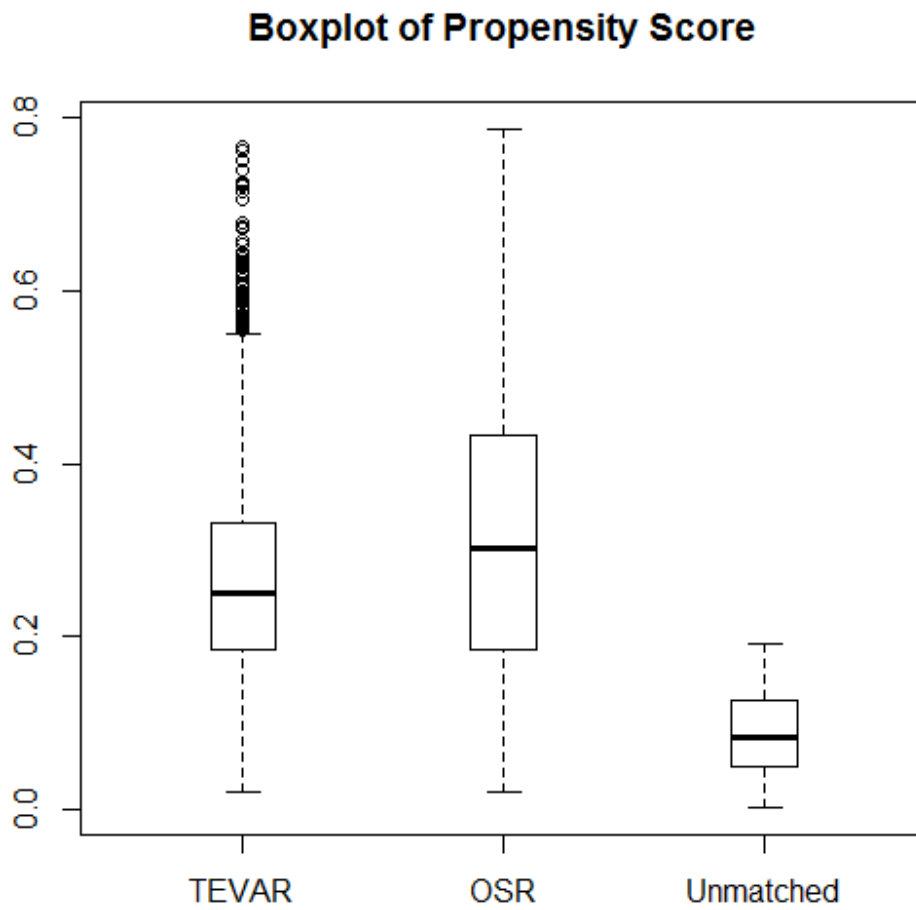

Figure S4. Landmark analysis. Contingent on 180-day survival, patients undergoing open surgical repair had superior mid-term survival.

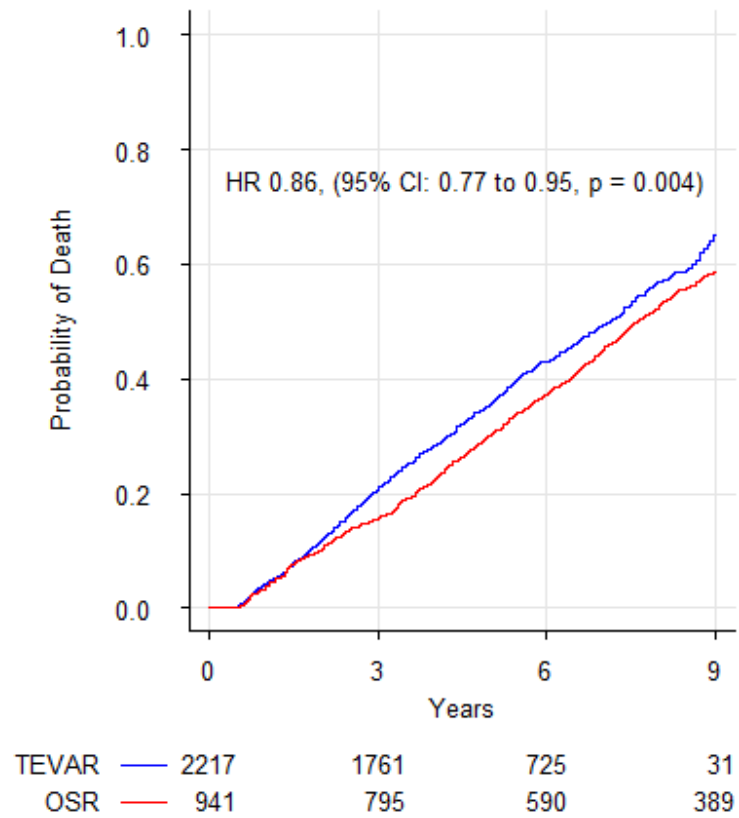

Figure S5. Plot of Restricted Mean Survival Time over time. The initial survival benefit of TEVAR is never overcome by open surgical repair despite the superior survival of open surgical repair in the landmark analysis.

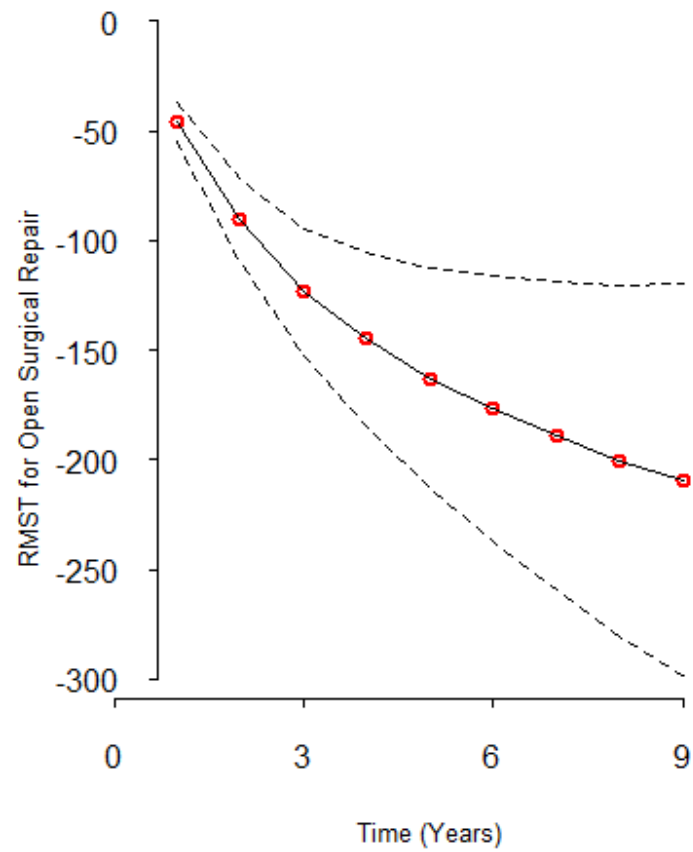



Figure S6. Unadjusted survival comparing matched and unmatched patients from the TEVAR group (post-9/2005).

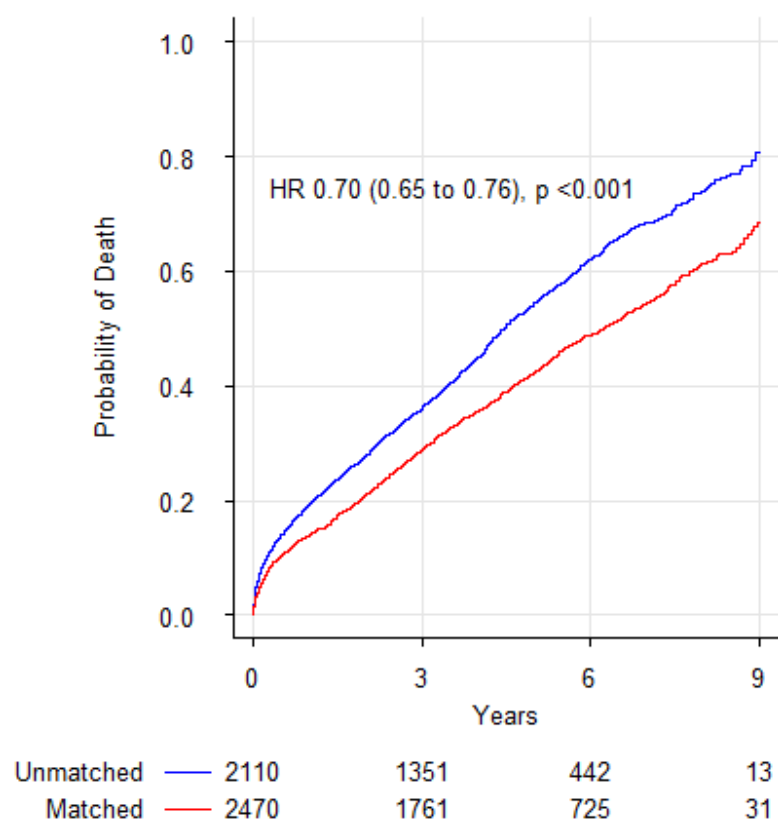

Figure S7. Sensitivity Analysis (Institutional Effects): Cumulative incidence of mortality restricting the dataset to the 349 hospitals present before and after the introduction of TEVAR RMST difference for open surgical repair was -153.8 days (95% CI -261.7 to -45.9),  $p = 0.005$ . This suggests that while restricting the analysis to only hospitals present in both the early and late periods reduced the effect size, open surgical repair continued to be associated with increased risk of death and reduced survival time during follow-up.

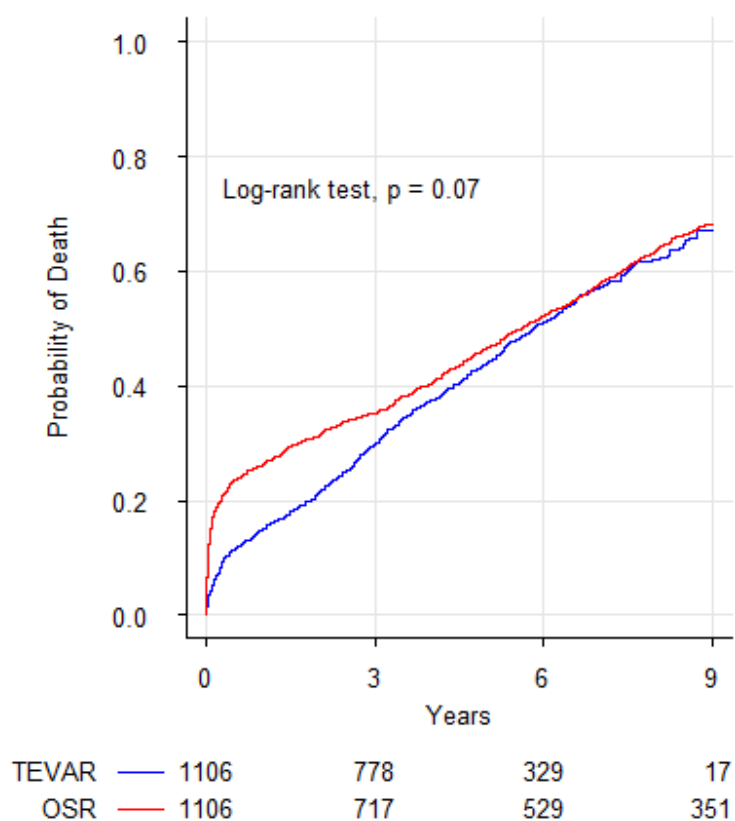

Figure S8. Sensitivity Analysis (Secular Trend): Adjusted survival curves constructed with inverse probability weighting with stabilized weights comparing survival following open surgical repair in patients from the early period and late period. There was no difference in mid-term survival, though there was decreased odds of early mortality in the second half of the study period with open surgical repair, OR 0.70 (95% CI 0.49 to 0.99),  $p = 0.04$ .

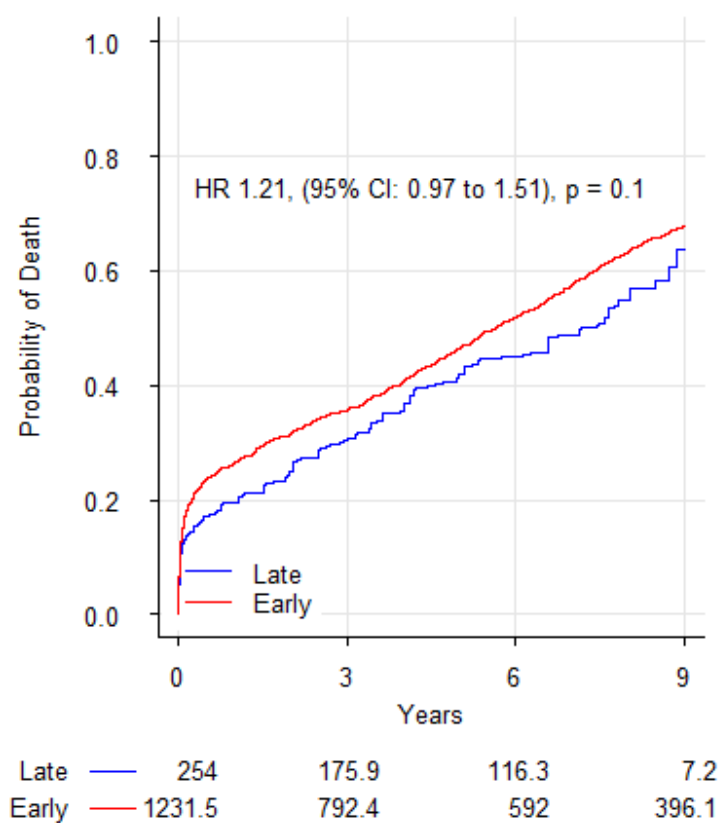

Figure S9. Sensitivity Analysis (Hospital Volume): Mid-term survival after accounting for open surgical volume. Patients undergoing open surgical repair at high-volume open surgical centers were matched with TEVAR patients. Despite reducing the difference in cumulative incidence of mortality, restricting the OSR population to only high-volume open surgical centers still resulted in reduced survival in the open surgical repair arm, RMST difference -136.7 days (95% CI -260.5 to -13.0),  $p = 0.03$ .

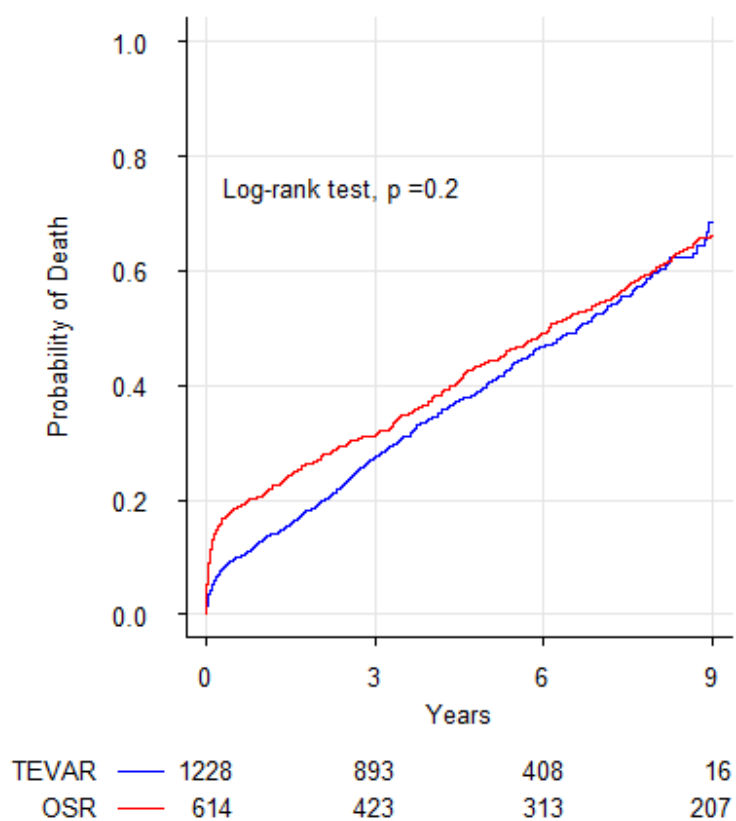

Figure S10. Sensitivity Analysis (Hospital Volume): Mid-term survival after accounting for open surgical volume. Patients undergoing open surgical repair at low-volume open surgical centers were matched with TEVAR patients. Restricting the OSR population to only low-volume open surgical centers resulted in reduced survival in the open surgical repair arm, RMST difference -330.6 days (95% CI -458.4 to -202.8),  $p < 0.001$ .

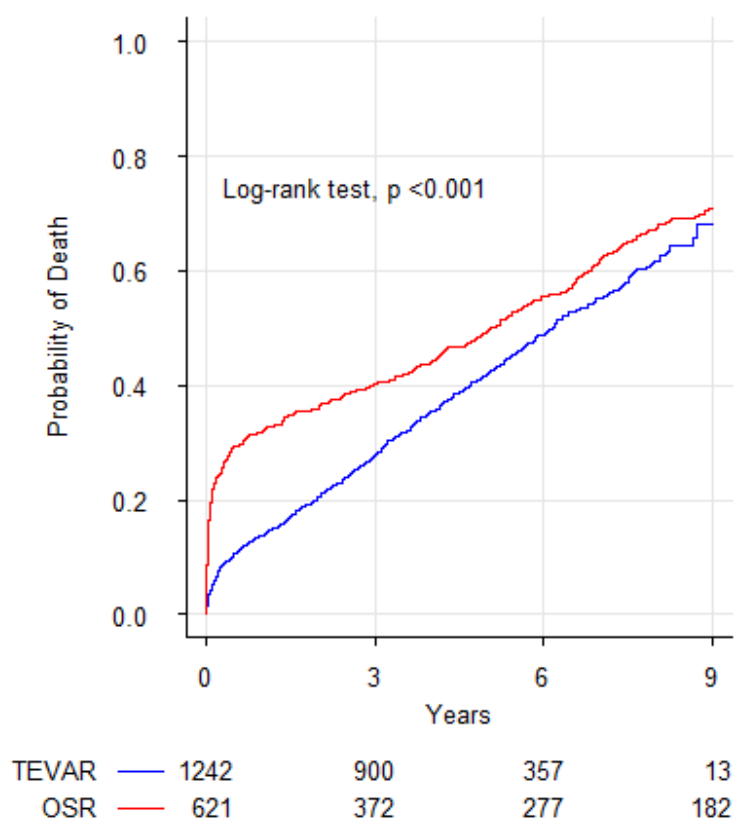

Figure S11. Sensitivity Analysis (Discontinuity): Mid-term survival after narrowing the population under investigation to the years immediately surrounding the discontinuity, i.e. 2004 to 2006. Despite not reaching statistical significance with the log-rank test, narrowing the population under investigation still resulted in reduced survival in the open surgical repair arm, RMST difference -231.7 days (95% CI -427.8 to -35.6),  $p = 0.02$ .

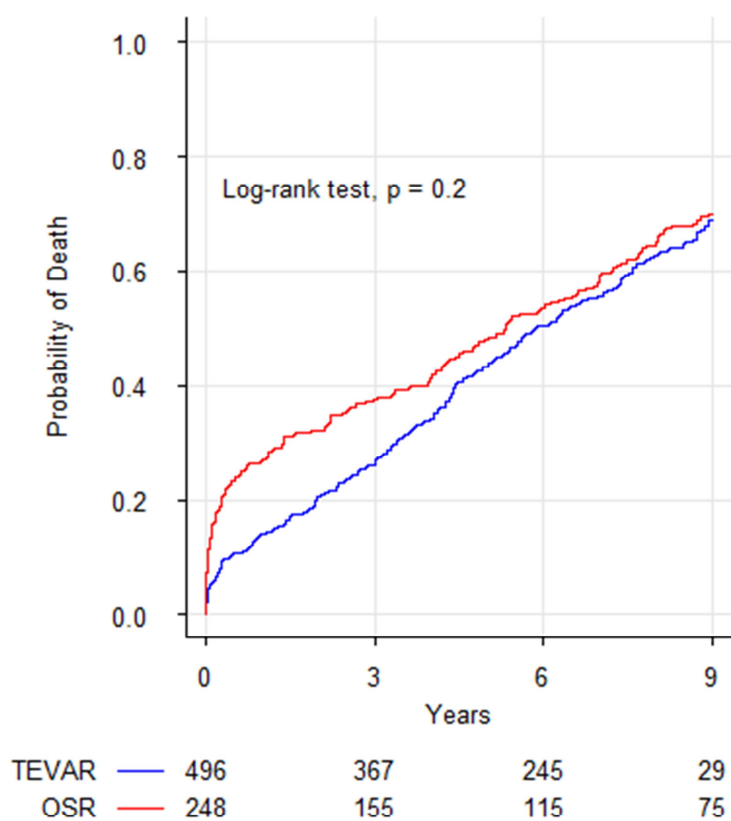

Table S1. Propensity Score Model.

|                                       | Estimate | Std. Error | z value | Pr(> z ) |
|---------------------------------------|----------|------------|---------|----------|
| (Intercept)                           | 0.328    | 0.559      | 0.586   | 0.558    |
| Age                                   | -0.017   | 0.008      | -2.182  | 0.029    |
| Male                                  | -0.103   | 0.083      | -1.236  | 0.216    |
| Age (categorical), $\geq 70$ , $< 80$ | 0.514    | 0.114      | 4.501   | 0.000    |
| Age (categorical), $\geq 80$          | -0.131   | 0.184      | -0.709  | 0.478    |
| Race, Black                           | -0.299   | 0.268      | -1.115  | 0.265    |
| Ethnicity, Hispanic                   | 0.194    | 0.366      | 0.529   | 0.597    |
| Race, North American Native           | 0.475    | 0.557      | 0.853   | 0.394    |
| Race, Other                           | -1.858   | 0.646      | -2.875  | 0.004    |
| Race, Unknown                         | -0.741   | 1.163      | -0.638  | 0.524    |
| Race, White                           | 0.122    | 0.243      | 0.502   | 0.616    |
| Alzheimer Dementia                    | -0.089   | 0.174      | -0.515  | 0.606    |
| Myocardial Infarction                 | -0.534   | 0.192      | -2.785  | 0.005    |
| Anemia                                | -0.216   | 0.081      | -2.679  | 0.007    |
| Asthma                                | -0.123   | 0.120      | -1.017  | 0.309    |
| Atrial Fibrillation                   | -0.114   | 0.107      | -1.068  | 0.286    |
| Breast Cancer                         | -0.056   | 0.221      | -0.254  | 0.799    |
| Colorectal Cancer                     | -0.433   | 0.243      | -1.786  | 0.074    |
| Endometrial Cancer                    | -0.119   | 0.568      | -0.209  | 0.835    |
| Lung Cancer                           | -0.135   | 0.209      | -0.648  | 0.517    |
| Prostate Cancer                       | 0.114    | 0.150      | 0.759   | 0.448    |
| Cataract                              | -0.332   | 0.080      | -4.149  | 0.000    |
| Congestive Heart Failure              | -0.016   | 0.086      | -0.184  | 0.854    |
| Chronic Kidney Disease                | -0.791   | 0.102      | -7.719  | 0.000    |
| End Stage Renal Disease               | 0.098    | 0.236      | 0.417   | 0.677    |
| Chronic Obstructive Pulmonary Disease | -0.116   | 0.077      | -1.498  | 0.134    |
| Depression                            | -0.490   | 0.102      | -4.8    | <0.001   |
| Diabetes                              | -0.163   | 0.089      | -1.838  | 0.066    |
| Glaucoma                              | -0.052   | 0.108      | -0.484  | 0.628    |
| Hip Fracture                          | 0.487    | 0.263      | 1.847   | 0.065    |
| Hyperlipidemia                        | -0.980   | 0.085      | -11.593 | <0.001   |
| Hypertension                          | 0.582    | 0.106      | 5.503   | <0.001   |
| Benign Prostatic Hyperplasia          | -0.246   | 0.109      | -2.251  | 0.024    |
| Hypothyroidism                        | -0.230   | 0.119      | -1.931  | 0.053    |
| Ischemic Heart Disease                | 0.995    | 0.092      | 10.847  | < 2e-16  |
| Osteoporosis                          | -0.329   | 0.133      | -2.465  | 0.014    |
| Arthritis                             | -0.342   | 0.084      | -4.08   | <0.001   |
| Stroke                                | -0.251   | 0.109      | -2.314  | 0.021    |
| Urgency (Urgent)                      | -0.109   | 0.131      | -0.837  | 0.402    |

|                               |        |       |        |        |
|-------------------------------|--------|-------|--------|--------|
| Urgency (Elective)            | -0.404 | 0.101 | -4.018 | <0.001 |
| Urgency (Unknown)             | -0.727 | 0.832 | -0.874 | 0.382  |
| Prior Aortic Arch Replacement | 0.060  | 0.262 | 0.228  | 0.819  |



Table S2. Baseline Characteristics of TEVAR patients who were able to be matched and those who were not matched.

|                                       | Unmatched         | Matched           | SMD   |
|---------------------------------------|-------------------|-------------------|-------|
|                                       | n = 2110          | n = 2470          |       |
| Operative Year, median [IQR]          | 2008 [2007, 2009] | 2008 [2007, 2009] | 0.050 |
| Age, mean (sd)                        | 77.35 (7.63)      | 72.97 (8.36)      | 0.546 |
| Age (categorical)                     |                   |                   | 0.642 |
| Age <70                               | 392 (18.6)        | 763 (30.9)        |       |
| Age >= 70 and <80                     | 805 (38.2)        | 1322 (53.5)       |       |
| Age >= 80                             | 913 (43.3)        | 385 (15.6)        |       |
| Male Gender                           | 1148 (54.4)       | 1423 (57.6)       | 0.065 |
| Race                                  |                   |                   | 0.254 |
| Asian                                 | 41 (1.9)          | 49 (2.0)          |       |
| Black                                 | 242 (11.5)        | 211 (8.5)         |       |
| Hispanic                              | 31 (1.5)          | 38 (1.5)          |       |
| North American Native                 | 7 (0.3)           | 12 (0.5)          |       |
| Other                                 | 64 (3.0)          | 6 (0.2)           |       |
| Unknown                               | 7 (0.3)           | 2 (0.1)           |       |
| White                                 | 1718 (81.4)       | 2152 (87.1)       |       |
| Alzheimer Dementia                    | 236 (11.2)        | 105 (4.3)         | 0.262 |
| Stroke or TIA                         | 554 (26.3)        | 298 (12.1)        | 0.367 |
| Depression                            | 723 (34.3)        | 378 (15.3)        | 0.450 |
| Myocardial Infarction                 | 189 (9.0)         | 91 (3.7)          | 0.218 |
| Atrial Fibrillation                   | 460 (21.8)        | 354 (14.3)        | 0.195 |
| Congestive Heart Failure              | 1019 (48.3)       | 746 (30.2)        | 0.377 |
| Ischemic Heart Disease                | 1495 (70.9)       | 1705 (69.0)       | 0.040 |
| Hypertension                          | 1911 (90.6)       | 1948 (78.9)       | 0.330 |
| Hyperlipidemia                        | 1887 (89.4)       | 1484 (60.1)       | 0.718 |
| Chronic Obstructive Pulmonary Disease | 1149 (54.5)       | 1047 (42.4)       | 0.243 |
| Asthma                                | 371 (17.6)        | 244 (9.9)         | 0.225 |
| Chronic Kidney Disease                | 1040 (49.3)       | 385 (15.6)        | 0.772 |
| Benign Prostatic Hyperplasia          | 600 (28.4)        | 374 (15.1)        | 0.326 |
| End-stage Renal Disease               | 93 (4.4)          | 61 (2.5)          | 0.107 |
| Diabetes                              | 827 (39.2)        | 531 (21.5)        | 0.392 |
| Hypothyroidism                        | 428 (20.3)        | 248 (10.0)        | 0.289 |
| Glaucoma                              | 443 (21.0)        | 291 (11.8)        | 0.251 |
| Cataract                              | 1503 (71.2)       | 1054 (42.7)       | 0.602 |
| Hip Fracture                          | 56 (2.7)          | 49 (2.0)          | 0.045 |
| Osteoporosis                          | 467 (22.1)        | 198 (8.0)         | 0.402 |
| Arthritis                             | 1222 (57.9)       | 704 (28.5)        | 0.622 |

|                                       |             |             |       |
|---------------------------------------|-------------|-------------|-------|
| Anemia                                | 1462 (69.3) | 983 (39.8)  | 0.620 |
| Breast Cancer                         | 96 (4.5)    | 66 (2.7)    | 0.101 |
| Colorectal Cancer                     | 120 (5.7)   | 58 (2.3)    | 0.171 |
| Prostate Cancer                       | 167 (7.9)   | 152 (6.2)   | 0.069 |
| Lung Cancer                           | 99 (4.7)    | 66 (2.7)    | 0.107 |
| Endometrial Cancer                    | 21 (1.0)    | 7 (0.3)     | 0.089 |
| Prior Aortic Valve Replacement        | 38 (1.8)    | 55 (2.2)    | 0.030 |
| Prior Aortic Root Replacement         | 13 (0.6)    | 25 (1.0)    | 0.044 |
| Prior Ascending Aortic Replacement    | 40 (1.9)    | 48 (1.9)    | 0.003 |
| Prior Aortic Arch Replacement         | 28 (1.3)    | 49 (2.0)    | 0.051 |
| Prior Mitral Valve Surgery            | 8 (0.4)     | 5 (0.2)     | 0.033 |
| Prior Tricuspid Valve Surgery         | 2 (0.1)     | 0 (0.0)     | 0.044 |
| Prior Coronary Artery Bypass Grafting | 183 (8.7)   | 184 (7.4)   | 0.045 |
| Prior Ventricular Assist Device       | 3 (0.1)     | 0 (0.0)     | 0.053 |
| Prior Transplant                      | 0 (0.0)     | 1 (0.0)     | 0.028 |
| Subclavian Bypass                     | 82 (3.9)    | 89 (3.6)    | 0.015 |
| High-Volume Open Surgical Center      | 756 (35.8)  | 894 (36.2)  | 0.008 |
| Urgency                               |             |             | 0.163 |
| Emergency                             | 223 (10.6)  | 369 (14.9)  |       |
| Urgent                                | 226 (10.7)  | 325 (13.2)  |       |
| Elective                              | 1658 (78.6) | 1771 (71.7) |       |
| Unknown                               | 3 (0.1)     | 5 (0.2)     |       |

Table S3. Sensitivity Analysis (Institutional Effects): Propensity score model restricting the dataset to the 349 hospitals present before and after the introduction of TEVAR

|                                       | Estimate | Std. Error | z value | Pr(> z ) |
|---------------------------------------|----------|------------|---------|----------|
| (Intercept)                           | 0.831    | 0.626      | 1.328   | 0.184    |
| Male                                  | -0.112   | 0.091      | -1.224  | 0.221    |
| Age                                   | -0.017   | 0.008      | -2.048  | 0.041    |
| Age (categorical), $\geq 70$ , <80    | 0.501    | 0.126      | 3.992   | <0.001   |
| Age (categorical), $\geq 80$          | -0.082   | 0.201      | -0.410  | 0.682    |
| Race, Black                           | -0.330   | 0.303      | -1.089  | 0.276    |
| Ethnicity, Hispanic                   | 0.229    | 0.411      | 0.557   | 0.577    |
| Race, North American Native           | 0.321    | 0.631      | 0.508   | 0.611    |
| Race, Other                           | -1.924   | 0.783      | -2.458  | 0.014    |
| Race, Unknown                         | -12.186  | 193.644    | -0.063  | 0.950    |
| Race, White                           | 0.093    | 0.277      | 0.337   | 0.736    |
| Alzheimer Dementia                    | -0.135   | 0.192      | -0.704  | 0.481    |
| Myocardial Infarction                 | -0.586   | 0.216      | -2.713  | 0.007    |
| Anemia                                | -0.204   | 0.087      | -2.333  | 0.020    |
| Asthma                                | -0.159   | 0.133      | -1.197  | 0.231    |
| Atrial Fibrillation                   | -0.114   | 0.115      | -0.988  | 0.323    |
| Breast Cancer                         | -0.251   | 0.253      | -0.994  | 0.320    |
| Colorectal Cancer                     | -0.495   | 0.259      | -1.909  | 0.056    |
| Endometrial Cancer                    | 0.010    | 0.600      | 0.017   | 0.987    |
| Lung Cancer                           | -0.342   | 0.241      | -1.423  | 0.155    |
| Prostate Cancer                       | 0.059    | 0.162      | 0.365   | 0.715    |
| Cataract                              | -0.424   | 0.086      | -4.917  | <0.001   |
| Congestive Heart Failure              | -0.007   | 0.094      | -0.077  | 0.938    |
| Chronic Kidney Disease                | -0.776   | 0.111      | -7.001  | <0.001   |
| Chronic Obstructive Pulmonary Disease | -0.080   | 0.084      | -0.955  | 0.339    |
| Depression                            | -0.495   | 0.109      | -4.530  | <0.001   |
| Diabetes                              | -0.160   | 0.098      | -1.638  | 0.101    |
| Glaucoma                              | -0.064   | 0.117      | -0.548  | 0.583    |
| Hip Fracture                          | 0.231    | 0.308      | 0.752   | 0.452    |
| Hyperlipidemia                        | -1.001   | 0.092      | -10.888 | <0.001   |
| Benign Prostatic Hyperplasia          | -0.196   | 0.120      | -1.638  | 0.101    |
| Hypertension                          | 0.471    | 0.116      | 4.058   | <0.001   |
| Hypothyroidism                        | -0.236   | 0.129      | -1.836  | 0.066    |
| Ischemic Heart Disease                | 0.908    | 0.100      | 9.085   | <0.001   |
| Osteoporosis                          | -0.402   | 0.147      | -2.740  | 0.006    |
| Arthritis                             | -0.286   | 0.091      | -3.145  | 0.002    |
| Stroke                                | -0.198   | 0.117      | -1.693  | 0.090    |

|                               |        |       |        |        |
|-------------------------------|--------|-------|--------|--------|
| End Stage Renal Disease       | 0.210  | 0.250 | 0.841  | 0.401  |
| Urgency (Urgent)              | -0.122 | 0.143 | -0.853 | 0.394  |
| Urgency (Elective)            | -0.423 | 0.110 | -3.843 | <0.001 |
| Urgency (Unknown)             | -0.391 | 0.912 | -0.429 | 0.668  |
| Prior Aortic Arch Replacement | -0.014 | 0.281 | -0.050 | 0.960  |

Table S4. Sensitivity Analysis (Institutional Effects): Baseline characteristics restricting the dataset to the 349 hospitals present before and after the introduction of TEVAR

|                              | Before Matching   |                      |            | After Matching    |                      |       |
|------------------------------|-------------------|----------------------|------------|-------------------|----------------------|-------|
|                              | TEVAR             | Open Surgical Repair | SMD        | TEVAR             | Open Surgical Repair | SMD   |
|                              | n = 3310          | n = 1106             |            | n = 1106          | n = 1106             |       |
| Operative Year, median [IQR] | 2008 [2007, 2009] | 2002 [2000, 2003]    | 3.732      | 2008 [2007, 2009] | 2002 [2000, 2003]    | 3.701 |
| Age, mean (sd)               | 75.09 (8.25)      | 72.87 (7.55)         | 0.281      | 73.10 (8.68)      | 72.87 (7.55)         | 0.029 |
| Age (categorical)            |                   |                      | 0.351      |                   |                      | 0.037 |
| Age <70                      | 817 (24.7)        | 327 (29.6)           |            | 314 (28.4)        | 327 (29.6)           |       |
| Age ≥ 70 and <80             | 1543 (46.6)       | 619 (56.0)           |            | 619 (56.0)        | 619 (56.0)           |       |
| Age ≥ 80                     | 950 (28.7)        | 160 (14.5)           |            | 173 (15.6)        | 160 (14.5)           |       |
| Male Gender                  | 1840 (55.6)       | 634 (57.3)           | 0.035      | 638 (57.7)        | 634 (57.3)           | 0.007 |
| Race                         |                   |                      | 0.153      |                   |                      | 0.041 |
| Asian                        | 60 (1.8)          | 21 (1.9)             |            | 17 (1.5)          | 21 (1.9)             |       |
| Black                        | 325 (9.8)         | 95 (8.6)             |            | 92 (8.3)          | 95 (8.6)             |       |
| Hispanic                     | 45 (1.4)          | 18 (1.6)             |            | 19 (1.7)          | 18 (1.6)             |       |
| North American Native        | 15 (0.5)          | 5 (0.5)              |            | 6 (0.5)           | 5 (0.5)              |       |
| Other                        | 43 (1.3)          | 2 (0.2)              |            | 1 (0.1)           | 2 (0.2)              |       |
| Unknown                      | 6 (0.2)           | 0 (0.0)              |            | 0 (0.0)           | 0 (0.0)              |       |
| White                        | 2816 (85.1)       | 965 (87.3)           | 971 (87.8) | 965 (87.3)        |                      |       |
| Alzheimer Dementia           | 237 (7.2)         | 42 (3.8)             | 0.148      | 52 (4.7)          | 42 (3.8)             | 0.045 |
| Stroke or TIA                | 619 (18.7)        | 125 (11.3)           | 0.208      | 131 (11.8)        | 125 (11.3)           | 0.017 |
| Depression                   | 812 (24.5)        | 149 (13.5)           | 0.285      | 158 (14.3)        | 149 (13.5)           | 0.024 |
| Myocardial Infarction        | 197 (6.0)         | 29 (2.6)             | 0.165      | 20 (1.8)          | 29 (2.6)             | 0.055 |
| Atrial Fibrillation          | 623 (18.8)        | 146 (13.2)           | 0.154      | 147 (13.3)        | 146 (13.2)           | 0.003 |
| Congestive Heart Failure     | 1278 (38.6)       | 301 (27.2)           | 0.244      | 297 (26.9)        | 301 (27.2)           | 0.008 |
| Ischemic Heart Disease       | 2376 (71.8)       | 805 (72.8)           | 0.022      | 762 (68.9)        | 805 (72.8)           | 0.086 |
| Hypertension                 | 2850 (86.1)       | 880 (79.6)           | 0.174      | 852 (77.0)        | 880 (79.6)           | 0.061 |

|                                       |             |            |       |            |            |        |
|---------------------------------------|-------------|------------|-------|------------|------------|--------|
| Hyperlipidemia                        | 2500 (75.5) | 560 (50.6) | 0.534 | 598 (54.1) | 560 (50.6) | 0.069  |
| Chronic Obstructive Pulmonary Disease | 1619 (48.9) | 435 (39.3) | 0.194 | 434 (39.2) | 435 (39.3) | 0.002  |
| Asthma                                | 439 (13.3)  | 95 (8.6)   | 0.15  | 93 (8.4)   | 95 (8.6)   | 0.006  |
| Chronic Kidney Disease                | 1038 (31.4) | 154 (13.9) | 0.426 | 155 (14.0) | 154 (13.9) | 0.003  |
| Benign Prostatic Hyperplasia          | 687 (20.8)  | 143 (12.9) | 0.21  | 140 (12.7) | 143 (12.9) | 0.008  |
| End-stage Renal Disease               | 108 (3.3)   | 26 (2.4)   | 0.055 | 24 (2.2)   | 26 (2.4)   | 0.012  |
| Diabetes                              | 984 (29.7)  | 209 (18.9) | 0.255 | 206 (18.6) | 209 (18.9) | 0.007  |
| Hypothyroidism                        | 506 (15.3)  | 98 (8.9)   | 0.198 | 105 (9.5)  | 98 (8.9)   | 0.022  |
| Glaucoma                              | 537 (16.2)  | 128 (11.6) | 0.135 | 123 (11.1) | 128 (11.6) | 0.014  |
| Cataract                              | 1918 (57.9) | 423 (38.2) | 0.402 | 425 (38.4) | 423 (38.2) | 0.004  |
| Hip Fracture                          | 77 (2.3)    | 16 (1.4)   | 0.065 | 14 (1.3)   | 16 (1.4)   | 0.016  |
| Osteoporosis                          | 496 (15.0)  | 78 (7.1)   | 0.255 | 91 (8.2)   | 78 (7.1)   | 0.044  |
| Arthritis                             | 1403 (42.4) | 280 (25.3) | 0.367 | 291 (26.3) | 280 (25.3) | 0.023  |
| Anemia                                | 1783 (53.9) | 399 (36.1) | 0.363 | 395 (35.7) | 399 (36.1) | 0.008  |
| Breast Cancer                         | 121 (3.7)   | 23 (2.1)   | 0.095 | 24 (2.2)   | 23 (2.1)   | 0.006  |
| Colorectal Cancer                     | 141 (4.3)   | 20 (1.8)   | 0.143 | 18 (1.6)   | 20 (1.8)   | 0.014  |
| Prostate Cancer                       | 237 (7.2)   | 64 (5.8)   | 0.056 | 62 (5.6)   | 64 (5.8)   | 0.008  |
| Lung Cancer                           | 121 (3.7)   | 26 (2.4)   | 0.077 | 29 (2.6)   | 26 (2.4)   | 0.017  |
| Endometrial Cancer                    | 20 (0.6)    | 4 (0.4)    | 0.035 | 2 (0.2)    | 4 (0.4)    | 0.035  |
| Prior Aortic Valve Replacement        | 75 (2.3)    | 24 (2.2)   | 0.007 | 27 (2.4)   | 24 (2.2)   | 0.018  |
| Prior Aortic Root Replacement         | 28 (0.8)    | 5 (0.5)    | 0.049 | 10 (0.9)   | 5 (0.5)    | 0.055  |
| Prior Ascending Aortic Replacement    | 76 (2.3)    | 40 (3.6)   | 0.078 | 22 (2.0)   | 40 (3.6)   | 0.099  |
| Prior Aortic Arch Replacement         | 65 (2.0)    | 21 (1.9)   | 0.005 | 25 (2.3)   | 21 (1.9)   | 0.025  |
| Prior Mitral Valve Surgery            | 9 (0.3)     | 6 (0.5)    | 0.043 | 3 (0.3)    | 6 (0.5)    | 0.043  |
| Prior Tricuspid Valve Surgery         | 1 (0.0)     | 0 (0.0)    | 0.025 | 0 (0.0)    | 0 (0.0)    | <0.001 |
| Prior Coronary Artery Bypass Grafting | 280 (8.5)   | 97 (8.8)   | 0.011 | 74 (6.7)   | 97 (8.8)   | 0.078  |
| Prior Ventricular Assist Device       | 2 (0.1)     | 0 (0.0)    | 0.035 | 1 (0.1)    | 0 (0.0)    | 0.043  |
| Prior Transplant                      | 1 (0.0)     | 0 (0.0)    | 0.025 | 0 (0.0)    | 0 (0.0)    | <0.001 |

|                                  |             |            |       |            |            |       |
|----------------------------------|-------------|------------|-------|------------|------------|-------|
| Subclavian Bypass                | 134 (4.0)   | 8 (0.7)    | 0.219 | 39 (3.5)   | 8 (0.7)    | 0.195 |
| High-Volume Open Surgical Center | 1602 (48.4) | 605 (54.7) | 0.126 | 522 (47.2) | 605 (54.7) | 0.151 |
| Urgency                          |             |            | 0.128 |            |            | 0.043 |
| Emergency                        | 422 (12.7)  | 177 (16.0) |       | 191 (17.3) | 177 (16.0) |       |
| Urgent                           | 402 (12.1)  | 161 (14.6) |       | 154 (13.9) | 161 (14.6) |       |
| Elective                         | 2481 (75.0) | 766 (69.3) |       | 760 (68.7) | 766 (69.3) |       |
| Unknown                          | 5 (0.2)     | 2 (0.2)    |       | 1 (0.1)    | 2 (0.2)    |       |

Table S5. Sensitivity Analysis (Secular Trend): Propensity score model for comparison of open surgical repair patients from the early period of the study with those from the late period

|                                       | Estimate | Std. Error | z value | Pr(> z ) |
|---------------------------------------|----------|------------|---------|----------|
| (Intercept)                           | -1.265   | 1.019      | -1.241  | 0.215    |
| Male                                  | -0.065   | 0.180      | -0.359  | 0.720    |
| Age                                   | 0.049    | 0.014      | 3.629   | <0.001   |
| Age (categorical), $\geq 70$ , <80    | 0.386    | 0.231      | 1.671   | 0.095    |
| Age (categorical), $\geq 80$          | -0.091   | 0.358      | -0.255  | 0.799    |
| Race, Black                           | -0.161   | 0.547      | -0.294  | 0.769    |
| Ethnicity, Hispanic                   | 0.292    | 0.767      | 0.380   | 0.704    |
| Race, North American Native           | 13.570   | 589.587    | 0.023   | 0.982    |
| Race, Other                           | -2.361   | 0.890      | -2.654  | 0.008    |
| Race, Unknown                         | 13.768   | 1455.398   | 0.009   | 0.992    |
| Race, White                           | 0.368    | 0.498      | 0.738   | 0.460    |
| Alzheimer Dementia                    | 0.362    | 0.390      | 0.927   | 0.354    |
| Myocardial Infarction                 | -0.321   | 0.372      | -0.862  | 0.388    |
| Anemia                                | -0.032   | 0.169      | -0.187  | 0.851    |
| Asthma                                | -0.305   | 0.238      | -1.280  | 0.200    |
| Atrial Fibrillation                   | -0.166   | 0.210      | -0.792  | 0.428    |
| Breast Cancer                         | -0.617   | 0.398      | -1.548  | 0.122    |
| Colorectal Cancer                     | -0.995   | 0.449      | -2.216  | 0.027    |
| Endometrial Cancer                    | -0.675   | 0.850      | -0.794  | 0.427    |
| Lung Cancer                           | 1.342    | 0.656      | 2.044   | 0.041    |
| Prostate Cancer                       | 0.379    | 0.368      | 1.030   | 0.303    |
| Cataract                              | -0.712   | 0.169      | -4.224  | <0.001   |
| Congestive Heart Failure              | -0.176   | 0.172      | -1.021  | 0.307    |
| Chronic Kidney Disease                | -0.300   | 0.207      | -1.455  | 0.146    |
| Chronic Obstructive Pulmonary Disease | 0.101    | 0.163      | 0.620   | 0.535    |
| Depression                            | -0.360   | 0.196      | -1.836  | 0.066    |
| Diabetes                              | 0.221    | 0.188      | 1.174   | 0.240    |
| Glaucoma                              | -0.323   | 0.216      | -1.492  | 0.136    |
| Hip Fracture                          | 0.257    | 0.556      | 0.461   | 0.644    |
| Hyperlipidemia                        | -0.945   | 0.179      | -5.273  | <0.001   |
| Benign Prostatic Hyperplasia          | 0.231    | 0.248      | 0.930   | 0.352    |
| Hypertension                          | -0.161   | 0.236      | -0.682  | 0.495    |
| Hypothyroidism                        | -0.363   | 0.232      | -1.567  | 0.117    |
| Ischemic Heart Disease                | 0.170    | 0.194      | 0.872   | 0.383    |
| Osteoporosis                          | -0.175   | 0.265      | -0.661  | 0.509    |
| Arthritis                             | -0.072   | 0.172      | -0.418  | 0.676    |



|                               |        |          |        |       |
|-------------------------------|--------|----------|--------|-------|
| Stroke                        | -0.410 | 0.205    | -1.998 | 0.046 |
| End Stage Renal Disease       | 0.314  | 0.467    | 0.673  | 0.501 |
| Urgency (Urgent)              | -0.220 | 0.254    | -0.868 | 0.386 |
| Urgency (Elective)            | 0.115  | 0.207    | 0.557  | 0.577 |
| Urgency (Unknown)             | 13.524 | 1020.685 | 0.013  | 0.989 |
| High-Volume Hospital          | 0.131  | 0.149    | 0.880  | 0.379 |
| Prior Aortic Arch Replacement | -0.371 | 0.459    | -0.809 | 0.419 |

Table S6. Sensitivity Analysis (Secular Trend): Baseline characteristics comparing open surgical repair patients from the early period of the study with those from the late period.

|                              | Before IPTW       |                   |               | After IPTW        |                   |       |
|------------------------------|-------------------|-------------------|---------------|-------------------|-------------------|-------|
|                              | early             | late              | SMD           | early             | late              | SMD   |
|                              | n = 1235          | n = 257           |               | n = 1231.54       | n = 254.02        |       |
| Operative Year, median [IQR] | 2002 [2000, 2003] | 2007 [2006, 2008] | 3.366         | 2002 [2000, 2003] | 2007 [2006, 2008] | 3.300 |
| Age, mean (sd)               | 72.88 (7.52)      | 70.71 (10.11)     | 0.244         | 72.44 (8.11)      | 72.12 (8.20)      | 0.040 |
| Age (categorical)            |                   |                   | 0.213         |                   |                   | 0.060 |
| Age <70                      | 362 (29.3)        | 100 (38.9)        |               | 384.7 (31.2)      | 77.8 (30.6)       |       |
| Age ≥ 70 and <80             | 700 (56.7)        | 121 (47.1)        |               | 676.3 (54.9)      | 145.5 (57.3)      |       |
| Age ≥ 80                     | 173 (14.0)        | 36 (14.0)         |               | 170.6 (13.8)      | 30.6 (12.1)       |       |
| Male Gender                  | 710 (57.5)        | 134 (52.1)        | 0.108         | 702.8 (57.1)      | 157.3 (61.9)      | 0.099 |
| Race                         |                   |                   | 0.256         |                   |                   | 0.118 |
| Asian                        | 25 (2.0)          | 6 (2.3)           |               | 25.5 (2.1)        | 5.9 (2.3)         |       |
| Black                        | 105 (8.5)         | 32 (12.5)         |               | 112.5 (9.1)       | 22 (8.7)          |       |
| Hispanic                     | 20 (1.6)          | 4 (1.6)           |               | 19.4 (1.6)        | 2.3 (0.9)         |       |
| North American Native        | 6 (0.5)           | 0 (0.0)           |               | 5 (0.4)           | 0 (0.0)           |       |
| Other                        | 3 (0.2)           | 6 (2.3)           |               | 5.5 (0.4)         | 1.4 (0.6)         |       |
| Unknown                      | 1 (0.1)           | 0 (0.0)           |               | 0.8 (0.1)         | 0 (0.0)           |       |
| White                        | 1075 (87.0)       | 209 (81.3)        | 1062.9 (86.3) | 222.3 (87.5)      |                   |       |
| Alzheimer Dementia           | 49 (4.0)          | 10 (3.9)          | 0.004         | 50 (4.1)          | 15.1 (5.9)        | 0.086 |
| Stroke or TIA                | 136 (11.0)        | 46 (17.9)         | 0.197         | 149.4 (12.1)      | 32.7 (12.9)       | 0.023 |
| Depression                   | 163 (13.2)        | 61 (23.7)         | 0.274         | 181 (14.7)        | 33.2 (13.1)       | 0.047 |
| Myocardial Infarction        | 36 (2.9)          | 12 (4.7)          | 0.092         | 39.2 (3.2)        | 6.9 (2.7)         | 0.027 |
| Atrial Fibrillation          | 159 (12.9)        | 45 (17.5)         | 0.129         | 167.2 (13.6)      | 38.3 (15.1)       | 0.043 |
| Congestive Heart Failure     | 343 (27.8)        | 96 (37.4)         | 0.206         | 362.3 (29.4)      | 82.7 (32.6)       | 0.068 |
| Ischemic Heart Disease       | 895 (72.5)        | 194 (75.5)        | 0.069         | 897.8 (72.9)      | 195.2 (76.8)      | 0.091 |
| Hypertension                 | 982 (79.5)        | 225 (87.5)        | 0.218         | 995.3 (80.8)      | 209.6 (82.5)      | 0.044 |

|                                       |            |            |        |              |              |        |
|---------------------------------------|------------|------------|--------|--------------|--------------|--------|
| Hyperlipidemia                        | 624 (50.5) | 185 (72.0) | 0.452  | 664.7 (54.0) | 148.4 (58.4) | 0.090  |
| Chronic Obstructive Pulmonary Disease | 482 (39.0) | 110 (42.8) | 0.077  | 486.8 (39.5) | 101.9 (40.1) | 0.012  |
| Asthma                                | 113 (9.1)  | 33 (12.8)  | 0.118  | 119.1 (9.7)  | 25.8 (10.1)  | 0.016  |
| Chronic Kidney Disease                | 170 (13.8) | 59 (23.0)  | 0.239  | 186.1 (15.1) | 39.3 (15.5)  | 0.010  |
| Benign Prostatic Hyperplasia          | 163 (13.2) | 32 (12.5)  | 0.022  | 162.5 (13.2) | 39.2 (15.4)  | 0.064  |
| End-stage Renal Disease               | 27 (2.2)   | 9 (3.5)    | 0.079  | 29.9 (2.4)   | 5.4 (2.1)    | 0.021  |
| Diabetes                              | 240 (19.4) | 58 (22.6)  | 0.077  | 246.8 (20.0) | 58.9 (23.2)  | 0.077  |
| Hypothyroidism                        | 110 (8.9)  | 35 (13.6)  | 0.149  | 118.2 (9.6)  | 22.2 (8.7)   | 0.030  |
| Glaucoma                              | 144 (11.7) | 39 (15.2)  | 0.103  | 147.4 (12.0) | 26.1 (10.3)  | 0.054  |
| Cataract                              | 481 (38.9) | 133 (51.8) | 0.259  | 502.5 (40.8) | 106.8 (42.0) | 0.025  |
| Hip Fracture                          | 22 (1.8)   | 5 (1.9)    | 0.012  | 22.3 (1.8)   | 4 (1.6)      | 0.017  |
| Osteoporosis                          | 93 (7.5)   | 30 (11.7)  | 0.141  | 100.3 (8.1)  | 19 (7.5)     | 0.024  |
| Arthritis                             | 313 (25.3) | 83 (32.3)  | 0.154  | 325.6 (26.4) | 72.3 (28.5)  | 0.045  |
| Anemia                                | 448 (36.3) | 117 (45.5) | 0.189  | 463.1 (37.6) | 105.4 (41.5) | 0.080  |
| Breast Cancer                         | 30 (2.4)   | 11 (4.3)   | 0.103  | 33.3 (2.7)   | 7 (2.8)      | 0.004  |
| Colorectal Cancer                     | 22 (1.8)   | 9 (3.5)    | 0.107  | 26.2 (2.1)   | 7.1 (2.8)    | 0.043  |
| Prostate Cancer                       | 72 (5.8)   | 11 (4.3)   | 0.071  | 68.2 (5.5)   | 14 (5.5)     | 0.002  |
| Lung Cancer                           | 34 (2.8)   | 3 (1.2)    | 0.115  | 30.7 (2.5)   | 4.9 (1.9)    | 0.037  |
| Endometrial Cancer                    | 4 (0.3)    | 3 (1.2)    | 0.098  | 5 (0.4)      | 1 (0.4)      | 0.003  |
| Prior Aortic Valve Replacement        | 27 (2.2)   | 8 (3.1)    | 0.058  | 27.2 (2.2)   | 5.1 (2.0)    | 0.014  |
| Prior Aortic Root Replacement         | 6 (0.5)    | 3 (1.2)    | 0.075  | 6.5 (0.5)    | 2.5 (1.0)    | 0.054  |
| Prior Ascending Aortic Replacement    | 44 (3.6)   | 9 (3.5)    | 0.003  | 45.2 (3.7)   | 9 (3.5)      | 0.007  |
| Prior Aortic Arch Replacement         | 23 (1.9)   | 8 (3.1)    | 0.080  | 26.4 (2.1)   | 9.6 (3.8)    | 0.096  |
| Prior Mitral Valve Surgery            | 6 (0.5)    | 1 (0.4)    | 0.015  | 5.8 (0.5)    | 1 (0.4)      | 0.012  |
| Prior Tricuspid Valve Surgery         | 0 (0.0)    | 0 (0.0)    | <0.001 | 0 (0.0)      | 0 (0.0)      | <0.001 |
| Prior Coronary Artery Bypass Grafting | 103 (8.3)  | 23 (8.9)   | 0.022  | 107.1 (8.7)  | 22.3 (8.8)   | 0.002  |
| Prior Ventricular Assist Device       | 0 (0.0)    | 0 (0.0)    | <0.001 | 0 (0.0)      | 0 (0.0)      | <0.001 |
| Prior Transplant                      | 0 (0.0)    | 0 (0.0)    | <0.001 | 0 (0.0)      | 0 (0.0)      | <0.001 |
| Subclavian Bypass                     | 8 (0.6)    | 3 (1.2)    | 0.055  | 7.8 (0.6)    | 1.7 (0.7)    | 0.005  |
| High-Volume Open Surgical Center      | 614 (49.7) | 124 (48.2) | 0.029  | 611.1 (49.6) | 130.9 (51.5) | 0.038  |

|           |            |            |       |              |              |
|-----------|------------|------------|-------|--------------|--------------|
| Urgency   |            |            |       |              |              |
| Emergency | 193 (15.6) | 45 (17.5)  | 0.159 | 198 (16.1)   | 46.7 (18.4)  |
| Urgent    | 177 (14.3) | 49 (19.1)  |       | 188.5 (15.3) | 33.6 (13.2)  |
| Elective  | 863 (69.9) | 163 (63.4) |       | 843.4 (68.5) | 173.7 (68.4) |
| Unknown   | 2 (0.2)    | 0 (0.0)    |       | 1.7 (0.1)    | 0 (0.0)      |
|           |            |            |       |              | 0.094        |

Table S7. Sensitivity Analysis (Hospital Volume): Propensity score model for comparison of high-volume open surgical centers with TEVAR.

|                                       | Estimate | Std. Error | z value | Pr(> z ) |
|---------------------------------------|----------|------------|---------|----------|
| (Intercept)                           | -0.858   | 0.735      | -1.167  | 0.243    |
| Age                                   | -0.015   | 0.010      | -1.492  | 0.136    |
| Male                                  | -0.090   | 0.109      | -0.832  | 0.405    |
| Age (categorical), $\geq 70$ , $< 80$ | 0.455    | 0.148      | 3.064   | 0.002    |
| Age (categorical), $\geq 80$          | -0.048   | 0.240      | -0.199  | 0.842    |
| Race, Black                           | -0.199   | 0.368      | -0.539  | 0.590    |
| Ethnicity, Hispanic                   | 0.019    | 0.534      | 0.035   | 0.972    |
| Race, North American Native           | -12.740  | 310.712    | -0.041  | 0.967    |
| Race, Other                           | -2.053   | 1.065      | -1.929  | 0.054    |
| Race, Unknown                         | -13.226  | 437.088    | -0.030  | 0.976    |
| Race, White                           | 0.249    | 0.336      | 0.740   | 0.459    |
| Alzheimer Dementia                    | -0.494   | 0.274      | -1.801  | 0.072    |
| Myocardial Infarction                 | -0.502   | 0.252      | -1.990  | 0.047    |
| Anemia                                | -0.231   | 0.106      | -2.187  | 0.029    |
| Asthma                                | 0.000    | 0.157      | -0.002  | 0.998    |
| Atrial Fibrillation                   | -0.078   | 0.139      | -0.557  | 0.577    |
| Breast Cancer                         | -0.278   | 0.325      | -0.855  | 0.392    |
| Colorectal Cancer                     | -0.107   | 0.288      | -0.373  | 0.709    |
| Endometrial Cancer                    | -0.126   | 0.768      | -0.164  | 0.869    |
| Lung Cancer                           | -0.226   | 0.284      | -0.798  | 0.425    |
| Prostate Cancer                       | 0.095    | 0.192      | 0.494   | 0.621    |
| Cataract                              | -0.288   | 0.106      | -2.720  | 0.007    |
| Congestive Heart Failure              | -0.008   | 0.113      | -0.069  | 0.945    |
| Chronic Kidney Disease                | -0.758   | 0.136      | -5.571  | 0.000    |
| End Stage Renal Disease               | -0.035   | 0.329      | -0.106  | 0.916    |
| Chronic Obstructive Pulmonary Disease | -0.213   | 0.103      | -2.070  | 0.038    |
| Depression                            | -0.362   | 0.133      | -2.711  | 0.007    |
| Diabetes                              | -0.323   | 0.121      | -2.675  | 0.007    |
| Glaucoma                              | -0.127   | 0.147      | -0.865  | 0.387    |
| Hip Fracture                          | -0.309   | 0.483      | -0.639  | 0.523    |
| Hyperlipidemia                        | -0.900   | 0.110      | -8.164  | <0.001   |
| Hypertension                          | 0.687    | 0.143      | 4.796   | <0.001   |
| Benign Prostatic Hyperplasia          | -0.219   | 0.141      | -1.548  | 0.122    |
| Hypothyroidism                        | -0.395   | 0.169      | -2.338  | 0.019    |
| Ischemic Heart Disease                | 1.174    | 0.125      | 9.409   | <0.001   |
| Osteoporosis                          | -0.581   | 0.194      | -2.989  | 0.003    |
| Arthritis                             | -0.385   | 0.111      | -3.479  | 0.001    |

|                               |         |         |        |       |
|-------------------------------|---------|---------|--------|-------|
| Stroke                        | -0.355  | 0.148   | -2.389 | 0.017 |
| Urgency (Urgent)              | -0.117  | 0.178   | -0.654 | 0.513 |
| Urgency (Elective)            | -0.286  | 0.137   | -2.098 | 0.036 |
| Urgency (Unknown)             | -13.891 | 489.410 | -0.028 | 0.977 |
| Prior Aortic Arch Replacement | 0.445   | 0.293   | 1.521  | 0.128 |

Table S8. Sensitivity Analysis (Hospital Volume): Baseline characteristics comparing high-volume open surgical centers with TEVAR.

|                               | Before Matching   |                      |             | After Matching    |                      |        |
|-------------------------------|-------------------|----------------------|-------------|-------------------|----------------------|--------|
|                               | TEVAR             | Open Surgical Repair | SMD         | TEVAR             | Open Surgical Repair | SMD    |
|                               | n = 4580          | n = 614              |             | n = 1228          | n = 614              |        |
| Operative Year, median [IQR]  | 2008 [2007, 2009] | 2001 [2000, 2003]    | 3.784       | 2008 [2007, 2009] | 2001 [2000, 2003]    | 3.687  |
| Age, mean (sd)                | 74.99 (8.32)      | 72.96 (7.38)         | 0.258       | 73.03 (8.24)      | 72.96 (7.38)         | 0.010  |
| Age (categorical)             |                   |                      | 0.324       |                   |                      | 0.013  |
| Age <70                       | 1155 (25.2)       | 182 (29.6)           |             | 369 (30.0)        | 182 (29.6)           |        |
| Age ≥ 70 and <80              | 2127 (46.4)       | 339 (55.2)           |             | 678 (55.2)        | 339 (55.2)           |        |
| Age ≥ 80                      | 1298 (28.3)       | 93 (15.1)            |             | 181 (14.7)        | 93 (15.1)            |        |
| Male Gender                   | 2571 (56.1)       | 364 (59.3)           | 0.064       | 741 (60.3)        | 364 (59.3)           | 0.022  |
| Race                          |                   |                      | 0.201       |                   |                      | 0.055  |
| Asian                         | 90 (2.0)          | 11 (1.8)             |             | 16 (1.3)          | 11 (1.8)             |        |
| Black                         | 453 (9.9)         | 51 (8.3)             |             | 104 (8.5)         | 51 (8.3)             |        |
| Hispanic                      | 69 (1.5)          | 7 (1.1)              |             | 10 (0.8)          | 7 (1.1)              |        |
| North American Native         | 19 (0.4)          | 0 (0.0)              |             | 0 (0.0)           | 0 (0.0)              |        |
| Other                         | 70 (1.5)          | 1 (0.2)              |             | 3 (0.2)           | 1 (0.2)              |        |
| Unknown                       | 9 (0.2)           | 0 (0.0)              |             | 0 (0.0)           | 0 (0.0)              |        |
| White                         | 3870 (84.5)       | 544 (88.6)           | 1095 (89.2) | 544 (88.6)        |                      |        |
| Alzheimer Dementia            | 341 (7.4)         | 16 (2.6)             | 0.223       | 32 (2.6)          | 16 (2.6)             | <0.001 |
| Stroke or TIA                 | 852 (18.6)        | 63 (10.3)            | 0.239       | 144 (11.7)        | 63 (10.3)            | 0.047  |
| Depression                    | 1101 (24.0)       | 87 (14.2)            | 0.253       | 188 (15.3)        | 87 (14.2)            | 0.032  |
| Myocardial Infarction         | 280 (6.1)         | 19 (3.1)             | 0.144       | 30 (2.4)          | 19 (3.1)             | 0.040  |
| Atrial Fibrillation           | 814 (17.8)        | 85 (13.8)            | 0.108       | 200 (16.3)        | 85 (13.8)            | 0.068  |
| Congestive Heart Failure      | 1765 (38.5)       | 175 (28.5)           | 0.214       | 368 (30.0)        | 175 (28.5)           | 0.032  |
| Ischemic Heart Disease        | 3200 (69.9)       | 469 (76.4)           | 0.147       | 969 (78.9)        | 469 (76.4)           | 0.061  |
| Hypertension                  | 3859 (84.3)       | 501 (81.6)           | 0.071       | 1046 (85.2)       | 501 (81.6)           | 0.096  |
| Hyperlipidemia                | 3371 (73.6)       | 328 (53.4)           | 0.429       | 738 (60.1)        | 328 (53.4)           | 0.135  |
| Chronic Obstructive Pulmonary | 2196 (47.9)       | 232 (37.8)           | 0.206       | 497 (40.5)        | 232 (37.8)           | 0.055  |

| Disease                               |             |             |       |            |             |        |
|---------------------------------------|-------------|-------------|-------|------------|-------------|--------|
| Asthma                                | 615 (13.4)  | 61 (9.9)    | 0.109 | 121 (9.9)  | 61 (9.9)    | 0.003  |
| Chronic Kidney Disease                | 1425 (31.1) | 87 (14.2)   | 0.413 | 204 (16.6) | 87 (14.2)   | 0.068  |
| Benign Prostatic Hyperplasia          | 974 (21.3)  | 89 (14.5)   | 0.177 | 189 (15.4) | 89 (14.5)   | 0.025  |
| End-stage Renal Disease               | 154 (3.4)   | 12 (2.0)    | 0.088 | 19 (1.5)   | 12 (2.0)    | 0.031  |
| Diabetes                              | 1358 (29.7) | 110 (17.9)  | 0.278 | 234 (19.1) | 110 (17.9)  | 0.029  |
| Hypothyroidism                        | 676 (14.8)  | 47 (7.7)    | 0.227 | 103 (8.4)  | 47 (7.7)    | 0.027  |
| Glaucoma                              | 734 (16.0)  | 67 (10.9)   | 0.150 | 144 (11.7) | 67 (10.9)   | 0.026  |
| Cataract                              | 2557 (55.8) | 245 (39.9)  | 0.323 | 514 (41.9) | 245 (39.9)  | 0.040  |
| Hip Fracture                          | 105 (2.3)   | 5 (0.8)     | 0.120 | 9 (0.7)    | 5 (0.8)     | 0.009  |
| Osteoporosis                          | 665 (14.5)  | 36 (5.9)    | 0.289 | 80 (6.5)   | 36 (5.9)    | 0.027  |
| Arthritis                             | 1926 (42.1) | 154 (25.1)  | 0.365 | 331 (27.0) | 154 (25.1)  | 0.043  |
| Anemia                                | 2445 (53.4) | 225 (36.6)  | 0.341 | 469 (38.2) | 225 (36.6)  | 0.032  |
| Breast Cancer                         | 162 (3.5)   | 12 (2.0)    | 0.097 | 22 (1.8)   | 12 (2.0)    | 0.012  |
| Colorectal Cancer                     | 178 (3.9)   | 15 (2.4)    | 0.083 | 27 (2.2)   | 15 (2.4)    | 0.016  |
| Prostate Cancer                       | 319 (7.0)   | 39 (6.4)    | 0.025 | 83 (6.8)   | 39 (6.4)    | 0.016  |
| Lung Cancer                           | 165 (3.6)   | 16 (2.6)    | 0.057 | 40 (3.3)   | 16 (2.6)    | 0.039  |
| Endometrial Cancer                    | 28 (0.6)    | 2 (0.3)     | 0.042 | 4 (0.3)    | 2 (0.3)     | <0.001 |
| Prior Aortic Valve Replacement        | 93 (2.0)    | 11 (1.8)    | 0.017 | 28 (2.3)   | 11 (1.8)    | 0.035  |
| Prior Aortic Root Replacement         | 38 (0.8)    | 3 (0.5)     | 0.042 | 12 (1.0)   | 3 (0.5)     | 0.057  |
| Prior Ascending Aortic Replacement    | 88 (1.9)    | 33 (5.4)    | 0.185 | 30 (2.4)   | 33 (5.4)    | 0.152  |
| Prior Aortic Arch Replacement         | 77 (1.7)    | 18 (2.9)    | 0.083 | 38 (3.1)   | 18 (2.9)    | 0.010  |
| Prior Mitral Valve Surgery            | 13 (0.3)    | 3 (0.5)     | 0.033 | 6 (0.5)    | 3 (0.5)     | <0.001 |
| Prior Tricuspid Valve Surgery         | 2 (0.0)     | 0 (0.0)     | 0.030 | 0 (0.0)    | 0 (0.0)     | <0.001 |
| Prior Coronary Artery Bypass Grafting | 367 (8.0)   | 56 (9.1)    | 0.040 | 93 (7.6)   | 56 (9.1)    | 0.056  |
| Prior Ventricular Assist Device       | 3 (0.1)     | 0 (0.0)     | 0.036 | 0 (0.0)    | 0 (0.0)     | <0.001 |
| Prior Transplant                      | 1 (0.0)     | 0 (0.0)     | 0.021 | 0 (0.0)    | 0 (0.0)     | <0.001 |
| Subclavian Bypass                     | 171 (3.7)   | 4 (0.7)     | 0.212 | 44 (3.6)   | 4 (0.7)     | 0.205  |
| High-Volume Open Surgical Center      | 1650 (36.0) | 614 (100.0) | 1.885 | 461 (37.5) | 614 (100.0) | 1.824  |



|           |             |            |       |            |            |
|-----------|-------------|------------|-------|------------|------------|
| Urgency   |             |            |       |            |            |
| Emergency | 592 (12.9)  | 85 (13.8)  | 0.073 | 160 (13.0) | 85 (13.8)  |
| Urgent    | 551 (12.0)  | 80 (13.0)  |       | 170 (13.8) | 80 (13.0)  |
| Elective  | 3429 (74.9) | 449 (73.1) |       | 898 (73.1) | 449 (73.1) |
| Unknown   | 8 (0.2)     | 0 (0.0)    |       | 0 (0.0)    | 0 (0.0)    |
|           |             |            |       |            | 0.031      |

Table S9. Sensitivity Analysis (Hospital Volume): Propensity score model for comparison of low-volume open surgical centers with TEVAR

|                                       | Estimate | Std. Error | z value | Pr(> z ) |
|---------------------------------------|----------|------------|---------|----------|
| (Intercept)                           | -0.116   | 0.707      | -0.164  | 0.870    |
| Age                                   | -0.016   | 0.010      | -1.690  | 0.091    |
| Male                                  | -0.133   | 0.108      | -1.228  | 0.219    |
| Age (categorical), $\geq 70$ , $< 80$ | 0.579    | 0.149      | 3.877   | <0.001   |
| Age (categorical), $\geq 80$          | -0.233   | 0.244      | -0.953  | 0.340    |
| Race, Black                           | -0.371   | 0.340      | -1.092  | 0.275    |
| Ethnicity, Hispanic                   | 0.318    | 0.445      | 0.714   | 0.475    |
| Race, North American Native           | 1.024    | 0.588      | 1.741   | 0.082    |
| Race, Other                           | -1.697   | 0.789      | -2.151  | 0.032    |
| Race, Unknown                         | -0.239   | 1.191      | -0.201  | 0.841    |
| Race, White                           | 0.016    | 0.306      | 0.051   | 0.959    |
| Alzheimer Dementia                    | 0.221    | 0.208      | 1.064   | 0.287    |
| Myocardial Infarction                 | -0.562   | 0.266      | -2.113  | 0.035    |
| Anemia                                | -0.232   | 0.108      | -2.150  | 0.032    |
| Asthma                                | -0.227   | 0.166      | -1.371  | 0.170    |
| Atrial Fibrillation                   | -0.164   | 0.146      | -1.124  | 0.261    |
| Breast Cancer                         | 0.143    | 0.275      | 0.522   | 0.602    |
| Colorectal Cancer                     | -0.907   | 0.399      | -2.270  | 0.023    |
| Endometrial Cancer                    | -0.050   | 0.762      | -0.065  | 0.948    |
| Lung Cancer                           | -0.081   | 0.270      | -0.298  | 0.766    |
| Prostate Cancer                       | 0.157    | 0.206      | 0.765   | 0.445    |
| Cataract                              | -0.371   | 0.107      | -3.480  | 0.001    |
| Congestive Heart Failure              | -0.026   | 0.115      | -0.224  | 0.823    |
| Chronic Kidney Disease                | -0.851   | 0.140      | -6.080  | <0.001   |
| End Stage Renal Disease               | 0.227    | 0.303      | 0.748   | 0.455    |
| Chronic Obstructive Pulmonary Disease | -0.032   | 0.102      | -0.309  | 0.758    |
| Depression                            | -0.635   | 0.142      | -4.481  | <0.001   |
| Diabetes                              | -0.030   | 0.116      | -0.255  | 0.799    |
| Glaucoma                              | 0.077    | 0.141      | 0.551   | 0.582    |
| Hip Fracture                          | 0.895    | 0.297      | 3.017   | 0.003    |
| Hyperlipidemia                        | -1.092   | 0.111      | -9.871  | <0.001   |
| Hypertension                          | 0.511    | 0.135      | 3.770   | <0.001   |
| Benign Prostatic Hyperplasia          | -0.284   | 0.150      | -1.893  | 0.058    |
| Hypothyroidism                        | -0.056   | 0.152      | -0.371  | 0.711    |
| Ischemic Heart Disease                | 0.882    | 0.118      | 7.444   | <0.001   |
| Osteoporosis                          | -0.121   | 0.170      | -0.712  | 0.476    |
| Arthritis                             | -0.312   | 0.113      | -2.768  | 0.006    |
| Stroke                                | -0.154   | 0.143      | -1.075  | 0.282    |

|                               |        |       |        |        |
|-------------------------------|--------|-------|--------|--------|
| Urgency (Urgent)              | -0.098 | 0.163 | -0.602 | 0.547  |
| Urgency (Elective)            | -0.496 | 0.127 | -3.901 | <0.001 |
| Urgency (Unknown)             | -0.215 | 0.847 | -0.254 | 0.800  |
| Prior Aortic Arch Replacement | -0.822 | 0.483 | -1.700 | 0.089  |

Table S10. Sensitivity Analysis (Hospital Volume): Baseline characteristics comparing low-volume open surgical centers with TEVAR.

|                              | Before Matching   |                      |             | After Matching    |                      |       |
|------------------------------|-------------------|----------------------|-------------|-------------------|----------------------|-------|
|                              | TEVAR             | Open Surgical Repair | SMD         | TEVAR             | Open Surgical Repair | SMD   |
|                              | n = 4580          | n = 621              |             | n = 1242          | n = 621              |       |
| Operative Year, median [IQR] | 2008 [2007, 2009] | 2002 [2000, 2003]    | 3.781       | 2008 [2007, 2009] | 2002 [2000, 2003]    | 3.809 |
| Age, mean (sd)               | 74.99 (8.32)      | 72.81 (7.66)         | 0.272       | 73.09 (8.31)      | 72.81 (7.66)         | 0.036 |
| Age (categorical)            |                   |                      | 0.391       |                   |                      | 0.031 |
| Age <70                      | 1155 (25.2)       | 180 (29.0)           |             | 347 (27.9)        | 180 (29.0)           |       |
| Age ≥ 70 and <80             | 2127 (46.4)       | 361 (58.1)           |             | 724 (58.3)        | 361 (58.1)           |       |
| Age ≥ 80                     | 1298 (28.3)       | 80 (12.9)            |             | 171 (13.8)        | 80 (12.9)            |       |
| Male Gender                  | 2571 (56.1)       | 346 (55.7)           | 0.008       | 653 (52.6)        | 346 (55.7)           | 0.063 |
| Race                         |                   |                      | 0.156       |                   |                      | 0.059 |
| Asian                        | 90 (2.0)          | 14 (2.3)             |             | 31 (2.5)          | 14 (2.3)             |       |
| Black                        | 453 (9.9)         | 54 (8.7)             |             | 109 (8.8)         | 54 (8.7)             |       |
| Hispanic                     | 69 (1.5)          | 13 (2.1)             |             | 20 (1.6)          | 13 (2.1)             |       |
| North American Native        | 19 (0.4)          | 6 (1.0)              |             | 8 (0.6)           | 6 (1.0)              |       |
| Other                        | 70 (1.5)          | 2 (0.3)              |             | 6 (0.5)           | 2 (0.3)              |       |
| Unknown                      | 9 (0.2)           | 1 (0.2)              |             | 2 (0.2)           | 1 (0.2)              |       |
| White                        | 3870 (84.5)       | 531 (85.5)           | 1066 (85.8) | 531 (85.5)        |                      |       |
| Alzheimer Dementia           | 341 (7.4)         | 33 (5.3)             | 0.087       | 65 (5.2)          | 33 (5.3)             | 0.004 |
| Stroke or TIA                | 852 (18.6)        | 73 (11.8)            | 0.192       | 143 (11.5)        | 73 (11.8)            | 0.008 |
| Depression                   | 1101 (24.0)       | 76 (12.2)            | 0.310       | 164 (13.2)        | 76 (12.2)            | 0.029 |
| Myocardial Infarction        | 280 (6.1)         | 17 (2.7)             | 0.165       | 37 (3.0)          | 17 (2.7)             | 0.014 |
| Atrial Fibrillation          | 814 (17.8)        | 74 (11.9)            | 0.165       | 162 (13.0)        | 74 (11.9)            | 0.034 |
| Congestive Heart Failure     | 1765 (38.5)       | 168 (27.1)           | 0.246       | 338 (27.2)        | 168 (27.1)           | 0.004 |
| Ischemic Heart Disease       | 3200 (69.9)       | 426 (68.6)           | 0.028       | 844 (68.0)        | 426 (68.6)           | 0.014 |
| Hypertension                 | 3859 (84.3)       | 481 (77.5)           | 0.174       | 978 (78.7)        | 481 (77.5)           | 0.031 |
| Hyperlipidemia               | 3371 (73.6)       | 296 (47.7)           | 0.551       | 624 (50.2)        | 296 (47.7)           | 0.052 |

|                                       |             |            |       |            |            |        |
|---------------------------------------|-------------|------------|-------|------------|------------|--------|
| Chronic Obstructive Pulmonary Disease | 2196 (47.9) | 250 (40.3) | 0.155 | 512 (41.2) | 250 (40.3) | 0.020  |
| Asthma                                | 615 (13.4)  | 52 (8.4)   | 0.163 | 116 (9.3)  | 52 (8.4)   | 0.034  |
| Chronic Kidney Disease                | 1425 (31.1) | 83 (13.4)  | 0.437 | 166 (13.4) | 83 (13.4)  | <0.001 |
| Benign Prostatic Hyperplasia          | 974 (21.3)  | 74 (11.9)  | 0.253 | 155 (12.5) | 74 (11.9)  | 0.017  |
| End-stage Renal Disease               | 154 (3.4)   | 15 (2.4)   | 0.057 | 27 (2.2)   | 15 (2.4)   | 0.016  |
| Diabetes                              | 1358 (29.7) | 130 (20.9) | 0.202 | 266 (21.4) | 130 (20.9) | 0.012  |
| Hypothyroidism                        | 676 (14.8)  | 63 (10.1)  | 0.140 | 129 (10.4) | 63 (10.1)  | 0.008  |
| Glaucoma                              | 734 (16.0)  | 77 (12.4)  | 0.104 | 136 (11.0) | 77 (12.4)  | 0.045  |
| Cataract                              | 2557 (55.8) | 236 (38.0) | 0.363 | 511 (41.1) | 236 (38.0) | 0.064  |
| Hip Fracture                          | 105 (2.3)   | 17 (2.7)   | 0.028 | 33 (2.7)   | 17 (2.7)   | 0.005  |
| Osteoporosis                          | 665 (14.5)  | 57 (9.2)   | 0.166 | 123 (9.9)  | 57 (9.2)   | 0.025  |
| Arthritis                             | 1926 (42.1) | 159 (25.6) | 0.353 | 342 (27.5) | 159 (25.6) | 0.044  |
| Anemia                                | 2445 (53.4) | 223 (35.9) | 0.357 | 458 (36.9) | 223 (35.9) | 0.020  |
| Breast Cancer                         | 162 (3.5)   | 18 (2.9)   | 0.036 | 40 (3.2)   | 18 (2.9)   | 0.019  |
| Colorectal Cancer                     | 178 (3.9)   | 7 (1.1)    | 0.177 | 11 (0.9)   | 7 (1.1)    | 0.024  |
| Prostate Cancer                       | 319 (7.0)   | 33 (5.3)   | 0.069 | 61 (4.9)   | 33 (5.3)   | 0.018  |
| Lung Cancer                           | 165 (3.6)   | 18 (2.9)   | 0.040 | 37 (3.0)   | 18 (2.9)   | 0.005  |
| Endometrial Cancer                    | 28 (0.6)    | 2 (0.3)    | 0.042 | 7 (0.6)    | 2 (0.3)    | 0.036  |
| Prior Aortic Valve Replacement        | 93 (2.0)    | 16 (2.6)   | 0.036 | 23 (1.9)   | 16 (2.6)   | 0.049  |
| Prior Aortic Root Replacement         | 38 (0.8)    | 3 (0.5)    | 0.043 | 8 (0.6)    | 3 (0.5)    | 0.022  |
| Prior Ascending Aortic Replacement    | 88 (1.9)    | 11 (1.8)   | 0.011 | 20 (1.6)   | 11 (1.8)   | 0.012  |
| Prior Aortic Arch Replacement         | 77 (1.7)    | 5 (0.8)    | 0.079 | 14 (1.1)   | 5 (0.8)    | 0.033  |
| Prior Mitral Valve Surgery            | 13 (0.3)    | 3 (0.5)    | 0.032 | 2 (0.2)    | 3 (0.5)    | 0.057  |
| Prior Tricuspid Valve Surgery         | 2 (0.0)     | 0 (0.0)    | 0.030 | 0 (0.0)    | 0 (0.0)    | <0.001 |
| Prior Coronary Artery Bypass Grafting | 367 (8.0)   | 47 (7.6)   | 0.017 | 74 (6.0)   | 47 (7.6)   | 0.064  |
| Prior Ventricular Assist Device       | 3 (0.1)     | 0 (0.0)    | 0.036 | 0 (0.0)    | 0 (0.0)    | <0.001 |
| Prior Transplant                      | 1 (0.0)     | 0 (0.0)    | 0.021 | 0 (0.0)    | 0 (0.0)    | <0.001 |
| Subclavian Bypass                     | 171 (3.7)   | 4 (0.6)    | 0.212 | 46 (3.7)   | 4 (0.6)    | 0.211  |

|                                  |             |            |       |            |            |       |
|----------------------------------|-------------|------------|-------|------------|------------|-------|
| High-Volume Open Surgical Center | 1650 (36.0) | 0 (0.0)    | 1.061 | 426 (34.3) | 0 (0.0)    | 1.022 |
| Urgency                          |             |            | 0.182 |            |            | 0.045 |
| Emergency                        | 592 (12.9)  | 108 (17.4) |       | 196 (15.8) | 108 (17.4) |       |
| Urgent                           | 551 (12.0)  | 97 (15.6)  |       | 196 (15.8) | 97 (15.6)  |       |
| Elective                         | 3429 (74.9) | 414 (66.7) |       | 845 (68.0) | 414 (66.7) |       |
| Unknown                          | 8 (0.2)     | 2 (0.3)    |       | 5 (0.4)    | 2 (0.3)    |       |

Table S11. Sensitivity Analysis (Discontinuity): Propensity score model for the comparison after narrowing the population under investigation to the years immediately surrounding the discontinuity, i.e. 2004 to 2006.

|                                       | Estimate | Std. Error | z value | Pr(> z ) |
|---------------------------------------|----------|------------|---------|----------|
| (Intercept)                           | 0.573    | 1.345      | 0.426   | 0.670    |
| Age                                   | -0.019   | 0.018      | -1.062  | 0.288    |
| Male                                  | 0.057    | 0.190      | 0.299   | 0.765    |
| Age (categorical), $\geq 70$ , $< 80$ | 0.327    | 0.256      | 1.274   | 0.203    |
| Age (categorical), $\geq 80$          | -0.129   | 0.414      | -0.310  | 0.756    |
| Race, Black                           | 0.026    | 0.598      | 0.044   | 0.965    |
| Ethnicity, Hispanic                   | -0.993   | 1.196      | -0.830  | 0.406    |
| Race, North American Native           | 0.300    | 1.363      | 0.220   | 0.826    |
| Race, Other                           | -14.270  | 589.100    | -0.024  | 0.981    |
| Race, Unknown                         | -12.840  | 926.400    | -0.014  | 0.989    |
| Race, White                           | 0.174    | 0.542      | 0.322   | 0.748    |
| Alzheimer Dementia                    | 0.580    | 0.320      | 1.813   | 0.070    |
| Myocardial Infarction                 | -0.265   | 0.363      | -0.730  | 0.466    |
| Anemia                                | 0.216    | 0.170      | 1.272   | 0.203    |
| Asthma                                | 0.006    | 0.243      | 0.026   | 0.980    |
| Atrial Fibrillation                   | 0.046    | 0.206      | 0.223   | 0.824    |
| Breast Cancer                         | -0.892   | 0.562      | -1.587  | 0.112    |
| Colorectal Cancer                     | -0.449   | 0.463      | -0.969  | 0.332    |
| Endometrial Cancer                    | -13.620  | 689.000    | -0.020  | 0.984    |
| Lung Cancer                           | -0.478   | 0.469      | -1.020  | 0.308    |
| Prostate Cancer                       | 0.227    | 0.304      | 0.747   | 0.455    |
| Cataract                              | -0.285   | 0.170      | -1.673  | 0.094    |
| Congestive Heart Failure              | -0.112   | 0.173      | -0.648  | 0.517    |
| Chronic Kidney Disease                | -0.729   | 0.207      | -3.520  | 0.000    |
| End Stage Renal Disease               | 0.070    | 0.561      | 0.125   | 0.900    |
| Chronic Obstructive Pulmonary Disease | -0.203   | 0.164      | -1.234  | 0.217    |
| Depression                            | -0.338   | 0.199      | -1.698  | 0.090    |
| Diabetes                              | 0.239    | 0.173      | 1.384   | 0.166    |
| Glaucoma                              | -0.341   | 0.231      | -1.475  | 0.140    |
| Hip Fracture                          | 0.669    | 0.456      | 1.466   | 0.143    |
| Hyperlipidemia                        | -0.478   | 0.186      | -2.568  | 0.010    |
| Hypertension                          | 0.269    | 0.272      | 0.988   | 0.323    |
| Benign Prostatic Hyperplasia          | -0.356   | 0.221      | -1.609  | 0.108    |
| Hypothyroidism                        | -0.003   | 0.226      | -0.012  | 0.990    |
| Ischemic Heart Disease                | 0.450    | 0.211      | 2.138   | 0.033    |
| Osteoporosis                          | -0.165   | 0.270      | -0.611  | 0.541    |
| Arthritis                             | -0.324   | 0.168      | -1.930  | 0.054    |

|                               |         |          |        |       |
|-------------------------------|---------|----------|--------|-------|
| Stroke                        | -0.071  | 0.209    | -0.341 | 0.733 |
| Urgency (Urgent)              | -0.342  | 0.278    | -1.230 | 0.219 |
| Urgency (Elective)            | -0.492  | 0.215    | -2.292 | 0.022 |
| Urgency (Unknown)             | -14.520 | 1024.000 | -0.014 | 0.989 |
| Prior Aortic Arch Replacement | 0.606   | 0.454    | 1.336  | 0.181 |



Table S12. Sensitivity Analysis (Discontinuity): Baseline characteristics for the comparison after narrowing the population under investigation to the years immediately surrounding the discontinuity, i.e. 2004 to 2006.

|                              | Before Matching   |                      |              | After Matching    |                      |        |
|------------------------------|-------------------|----------------------|--------------|-------------------|----------------------|--------|
|                              | TEVAR             | Open Surgical Repair | SMD          | TEVAR             | Open Surgical Repair | SMD    |
|                              | n = 919           | n = 248              |              | n = 496           | n = 248              |        |
| Operative Year, median [IQR] | 2006 [2006, 2006] | 2004 [2004, 2005]    | 3.216        | 2006 [2006, 2006] | 2004 [2004, 2005]    | 3.202  |
| Age, mean (sd)               | 75.28 (7.69)      | 73.26 (7.73)         | 0.261        | 73.69 (7.72)      | 73.26 (7.73)         | 0.055  |
| Age (categorical)            |                   |                      | 0.284        |                   |                      | 0.023  |
| Age <70                      | 226.0 (24.6)      | 74.0 (29.8)          |              | 143.0 (28.8)      | 74.0 (29.8)          |        |
| Age ≥ 70 and <80             | 434.0 (47.2)      | 133.0 (53.6)         |              | 269.0 (54.2)      | 133.0 (53.6)         |        |
| Age ≥ 80                     | 259.0 (28.2)      | 41.0 (16.5)          |              | 84.0 (16.9)       | 41.0 (16.5)          |        |
| Male Gender                  | 534.0 (58.1)      | 149.0 (60.1)         | 0.040        | 295.0 (59.5)      | 149.0 (60.1)         | 0.012  |
| Race                         |                   |                      | 0.163        |                   |                      | 0.068  |
| Asian                        | 18.0 ( 2.0)       | 5.0 ( 2.0)           |              | 11.0 ( 2.2)       | 5.0 ( 2.0)           |        |
| Black                        | 77.0 ( 8.4)       | 23.0 ( 9.3)          |              | 40.0 ( 8.1)       | 23.0 ( 9.3)          |        |
| Hispanic                     | 11.0 ( 1.2)       | 1.0 ( 0.4)           |              | 4.0 ( 0.8)        | 1.0 ( 0.4)           |        |
| North American Native        | 3.0 ( 0.3)        | 1.0 ( 0.4)           |              | 2.0 ( 0.4)        | 1.0 ( 0.4)           |        |
| Other                        | 6.0 ( 0.7)        | 0.0 ( 0.0)           |              | 0.0 ( 0.0)        | 0.0 ( 0.0)           |        |
| Unknown                      | 2.0 ( 0.2)        | 0.0 ( 0.0)           |              | 0.0 ( 0.0)        | 0.0 ( 0.0)           |        |
| White                        | 802.0 (87.3)      | 218.0 (87.9)         | 439.0 (88.5) | 218.0 (87.9)      |                      |        |
| Alzheimer Dementia           | 55.0 ( 6.0)       | 17.0 ( 6.9)          | 0.036        | 31.0 ( 6.2)       | 17.0 ( 6.9)          | 0.024  |
| Stroke or TIA                | 185.0 (20.1)      | 41.0 (16.5)          | 0.093        | 76.0 (15.3)       | 41.0 (16.5)          | 0.033  |
| Depression                   | 225.0 (24.5)      | 46.0 (18.5)          | 0.145        | 91.0 (18.3)       | 46.0 (18.5)          | 0.005  |
| Myocardial Infarction        | 52.0 ( 5.7)       | 11.0 ( 4.4)          | 0.056        | 26.0 ( 5.2)       | 11.0 ( 4.4)          | 0.038  |
| Atrial Fibrillation          | 193.0 (21.0)      | 48.0 (19.4)          | 0.041        | 100.0 (20.2)      | 48.0 (19.4)          | 0.020  |
| Congestive Heart Failure     | 408.0 (44.4)      | 94.0 (37.9)          | 0.132        | 198.0 (39.9)      | 94.0 (37.9)          | 0.041  |
| Ischemic Heart Disease       | 720.0 (78.3)      | 199.0 (80.2)         | 0.047        | 398.0 (80.2)      | 199.0 (80.2)         | <0.001 |
| Hypertension                 | 833.0 (90.6)      | 218.0 (87.9)         | 0.089        | 445.0 (89.7)      | 218.0 (87.9)         | 0.058  |
| Hyperlipidemia               | 703.0 (76.5)      | 165.0 (66.5)         | 0.222        | 345.0 (69.6)      | 165.0 (66.5)         | 0.065  |

|                                       |              |              |        |              |              |        |
|---------------------------------------|--------------|--------------|--------|--------------|--------------|--------|
| Chronic Obstructive Pulmonary Disease | 490.0 (53.3) | 116.0 (46.8) | 0.131  | 233.0 (47.0) | 116.0 (46.8) | 0.004  |
| Asthma                                | 123.0 (13.4) | 30.0 (12.1)  | 0.039  | 63.0 (12.7)  | 30.0 (12.1)  | 0.018  |
| Chronic Kidney Disease                | 272.0 (29.6) | 44.0 (17.7)  | 0.282  | 95.0 (19.2)  | 44.0 (17.7)  | 0.036  |
| Benign Prostatic Hyperplasia          | 214.0 (23.3) | 41.0 (16.5)  | 0.170  | 90.0 (18.1)  | 41.0 (16.5)  | 0.043  |
| End-stage Renal Disease               | 23.0 ( 2.5)  | 5.0 ( 2.0)   | 0.033  | 6.0 ( 1.2)   | 5.0 ( 2.0)   | 0.064  |
| Diabetes                              | 266.0 (28.9) | 75.0 (30.2)  | 0.028  | 152.0 (30.6) | 75.0 (30.2)  | 0.009  |
| Hypothyroidism                        | 147.0 (16.0) | 33.0 (13.3)  | 0.076  | 64.0 (12.9)  | 33.0 (13.3)  | 0.012  |
| Glaucoma                              | 158.0 (17.2) | 28.0 (11.3)  | 0.169  | 53.0 (10.7)  | 28.0 (11.3)  | 0.019  |
| Cataract                              | 569.0 (61.9) | 122.0 (49.2) | 0.258  | 261.0 (52.6) | 122.0 (49.2) | 0.069  |
| Hip Fracture                          | 24.0 ( 2.6)  | 8.0 ( 3.2)   | 0.036  | 14.0 ( 2.8)  | 8.0 ( 3.2)   | 0.024  |
| Osteoporosis                          | 132.0 (14.4) | 25.0 (10.1)  | 0.131  | 50.0 (10.1)  | 25.0 (10.1)  | <0.001 |
| Arthritis                             | 394.0 (42.9) | 81.0 (32.7)  | 0.212  | 171.0 (34.5) | 81.0 (32.7)  | 0.038  |
| Anemia                                | 506.0 (55.1) | 129.0 (52.0) | 0.061  | 261.0 (52.6) | 129.0 (52.0) | 0.012  |
| Breast Cancer                         | 38.0 ( 4.1)  | 4.0 ( 1.6)   | 0.151  | 6.0 ( 1.2)   | 4.0 ( 1.6)   | 0.034  |
| Colorectal Cancer                     | 39.0 ( 4.2)  | 6.0 ( 2.4)   | 0.102  | 14.0 ( 2.8)  | 6.0 ( 2.4)   | 0.025  |
| Prostate Cancer                       | 66.0 ( 7.2)  | 19.0 ( 7.7)  | 0.018  | 34.0 ( 6.9)  | 19.0 ( 7.7)  | 0.031  |
| Lung Cancer                           | 38.0 ( 4.1)  | 6.0 ( 2.4)   | 0.096  | 19.0 ( 3.8)  | 6.0 ( 2.4)   | 0.081  |
| Endometrial Cancer                    | 4.0 ( 0.4)   | 0.0 ( 0.0)   | 0.094  | 0.0 ( 0.0)   | 0.0 ( 0.0)   | <0.001 |
| Prior Aortic Valve Replacement        | 28.0 ( 3.0)  | 9.0 ( 3.6)   | 0.032  | 19.0 ( 3.8)  | 9.0 ( 3.6)   | 0.011  |
| Prior Aortic Root Replacement         | 14.0 ( 1.5)  | 4.0 ( 1.6)   | 0.007  | 10.0 ( 2.0)  | 4.0 ( 1.6)   | 0.030  |
| Prior Ascending Aortic Replacement    | 15.0 ( 1.6)  | 14.0 ( 5.6)  | 0.216  | 12.0 ( 2.4)  | 14.0 ( 5.6)  | 0.165  |
| Prior Aortic Arch Replacement         | 17.0 ( 1.8)  | 9.0 ( 3.6)   | 0.109  | 14.0 ( 2.8)  | 9.0 ( 3.6)   | 0.046  |
| Prior Mitral Valve Surgery            | 3.0 ( 0.3)   | 2.0 ( 0.8)   | 0.064  | 1.0 ( 0.2)   | 2.0 ( 0.8)   | 0.085  |
| Prior Tricuspid Valve Surgery         | 0.0 ( 0.0)   | 0.0 ( 0.0)   | <0.001 | 0.0 ( 0.0)   | 0.0 ( 0.0)   | <0.001 |
| Prior Coronary Artery Bypass Grafting | 76.0 ( 8.3)  | 24.0 ( 9.7)  | 0.049  | 38.0 ( 7.7)  | 24.0 ( 9.7)  | 0.072  |
| Prior Ventricular Assist Device       | 0.0 ( 0.0)   | 0.0 ( 0.0)   | <0.001 | 0.0 ( 0.0)   | 0.0 ( 0.0)   | <0.001 |
| Prior Transplant                      | 0.0 ( 0.0)   | 0.0 ( 0.0)   | <0.001 | 0.0 ( 0.0)   | 0.0 ( 0.0)   | <0.001 |
| Subclavian Bypass                     | 33.0 ( 3.6)  | 1.0 ( 0.4)   | 0.229  | 20.0 ( 4.0)  | 1.0 ( 0.4)   | 0.248  |

|                                  |              |              |       |              |              |       |
|----------------------------------|--------------|--------------|-------|--------------|--------------|-------|
| High-Volume Open Surgical Center | 379.0 (41.2) | 120.0 (48.4) | 0.144 | 208.0 (41.9) | 120.0 (48.4) | 0.130 |
| Urgency                          |              |              | 0.175 |              |              | 0.069 |
| Emergency                        | 111.0 (12.1) | 44.0 (17.7)  |       | 76.0 (15.3)  | 44.0 (17.7)  |       |
| Urgent                           | 131.0 (14.3) | 36.0 (14.5)  |       | 70.0 (14.1)  | 36.0 (14.5)  |       |
| Elective                         | 675.0 (73.4) | 168.0 (67.7) |       | 350.0 (70.6) | 168.0 (67.7) |       |
| Unknown                          | 2.0 ( 0.2)   | 0.0 ( 0.0)   |       | 0.0 ( 0.0)   | 0.0 ( 0.0)   |       |

## REFERENCES

1. Goodney PP, Travis L, Lucas FL, et al. Survival after open versus endovascular thoracic aortic aneurysm repair in an observational study of the Medicare population. *Circulation*. Dec 13 2011;124(24):2661-2669.
2. Estrera AL, Miller CC, 3rd, Chen EP, et al. Descending thoracic aortic aneurysm repair: 12-year experience using distal aortic perfusion and cerebrospinal fluid drainage. *Annals of Thoracic Surgery*. Oct 2005;80(4):1290-1296; discussion 1296.
3. Kulik A, Castner CF, Kouchoukos NT. Replacement of the descending thoracic aorta: contemporary outcomes using hypothermic circulatory arrest. *Journal of Thoracic and Cardiovascular Surgery*. Feb 2010;139(2):249-255.
4. Estrera AL, Miller CC, 3rd, Chen EP, et al. Descending thoracic aortic aneurysm repair: 12-year experience using distal aortic perfusion and cerebrospinal fluid drainage. *The Annals of thoracic surgery*. Oct 2005;80(4):1290-1296; discussion 1296.
5. Bavaria JE, Appoo JJ, Makaroun MS, et al. Endovascular stent grafting versus open surgical repair of descending thoracic aortic aneurysms in low-risk patients: a multicenter comparative trial. *The Journal of thoracic and cardiovascular surgery*. Feb 2007;133(2):369-377.
6. Williams JB, Peterson ED, Zhao Y, et al. Contemporary results for proximal aortic replacement in North America. *Journal of the American College of Cardiology*. Sep 25 2012;60(13):1156-1162.
7. Schaffer JM, Lingala B, Miller DC, Woo YJ, Mitchell RS, Dake MD. Midterm survival after thoracic endovascular aortic repair in more than 10,000 Medicare patients. *The Journal of thoracic and cardiovascular surgery*. Mar 2015;149(3):808-820; discussion 820-803.
8. Schaffer JM, Lingala B, Fischbein MP, et al. Midterm Outcomes of Open Descending Thoracic Aortic Repair in More Than 5,000 Medicare Patients. *The Annals of thoracic surgery*. Dec 2015;100(6):2087-2094.

9. Chiu P, Sailer A, Baiocchi M, et al. Impact of Discordant Views in the Management of Descending Thoracic Aortic Aneurysm. *Seminars in Thoracic and Cardiovascular Surgery*. 2017(In press).
10. Demers P, Miller DC, Mitchell RS, et al. Midterm results of endovascular repair of descending thoracic aortic aneurysms with first-generation stent grafts. *The Journal of thoracic and cardiovascular surgery*. Mar 2004;127(3):664-673.
11. Silber JH, Rosenbaum PR, Trudeau ME, et al. Multivariate matching and bias reduction in the surgical outcomes study. *Medical care*. Oct 2001;39(10):1048-1064.
12. Uno H, Claggett B, Tian L, et al. Moving beyond the hazard ratio in quantifying the between-group difference in survival analysis. *Journal of clinical oncology : official journal of the American Society of Clinical Oncology*. Aug 1 2014;32(22):2380-2385.
13. Di Luozzo G, Geisbusch S, Lin HM, et al. Open repair of descending and thoracoabdominal aortic aneurysms and dissections in patients aged younger than 60 years: superior to endovascular repair? *The Annals of thoracic surgery*. Jan 2013;95(1):12-19; discussion 19.
14. Cheng D, Martin J, Shennib H, et al. Endovascular aortic repair versus open surgical repair for descending thoracic aortic disease a systematic review and meta-analysis of comparative studies. *Journal of the American College of Cardiology*. Mar 9 2010;55(10):986-1001.
15. Austin PC, Stuart EA. Moving towards best practice when using inverse probability of treatment weighting (IPTW) using the propensity score to estimate causal treatment effects in observational studies. *Statistics in medicine*. Dec 10 2015;34(28):3661-3679.
16. Lumley T. Analysis of complex survey samples. *Journal of Statistical Software*. 2004;9(1):1-19.
17. Therneau TM, Grambsch PM. *Modeling Survival Data: Extending the Cox Model*. New York: Springer; 2000.
